# Supplementary material
Source: PubMed Central journal article supplement (PMC8091090)
Supplement: IAI.00016-21-s0001.pdf [file IAI.00016-21-s0001.pdf]

Supplementary Figure S1

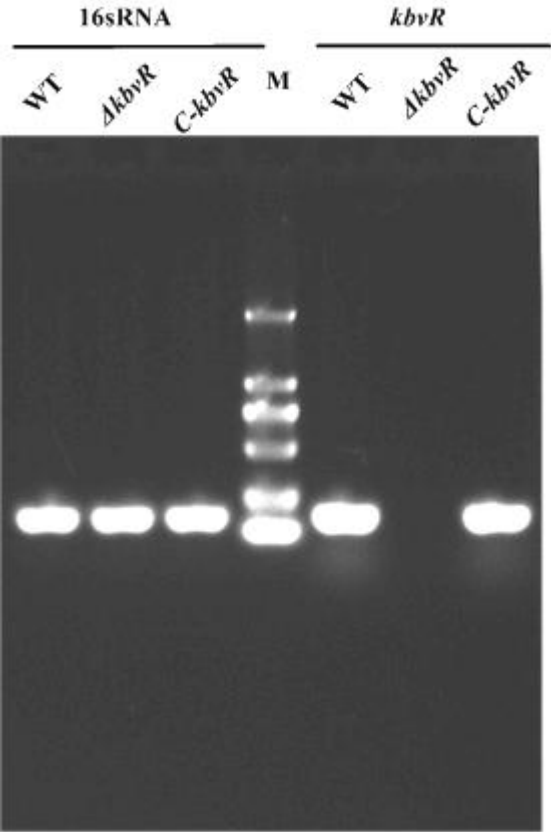

# Supplementary Figure S2

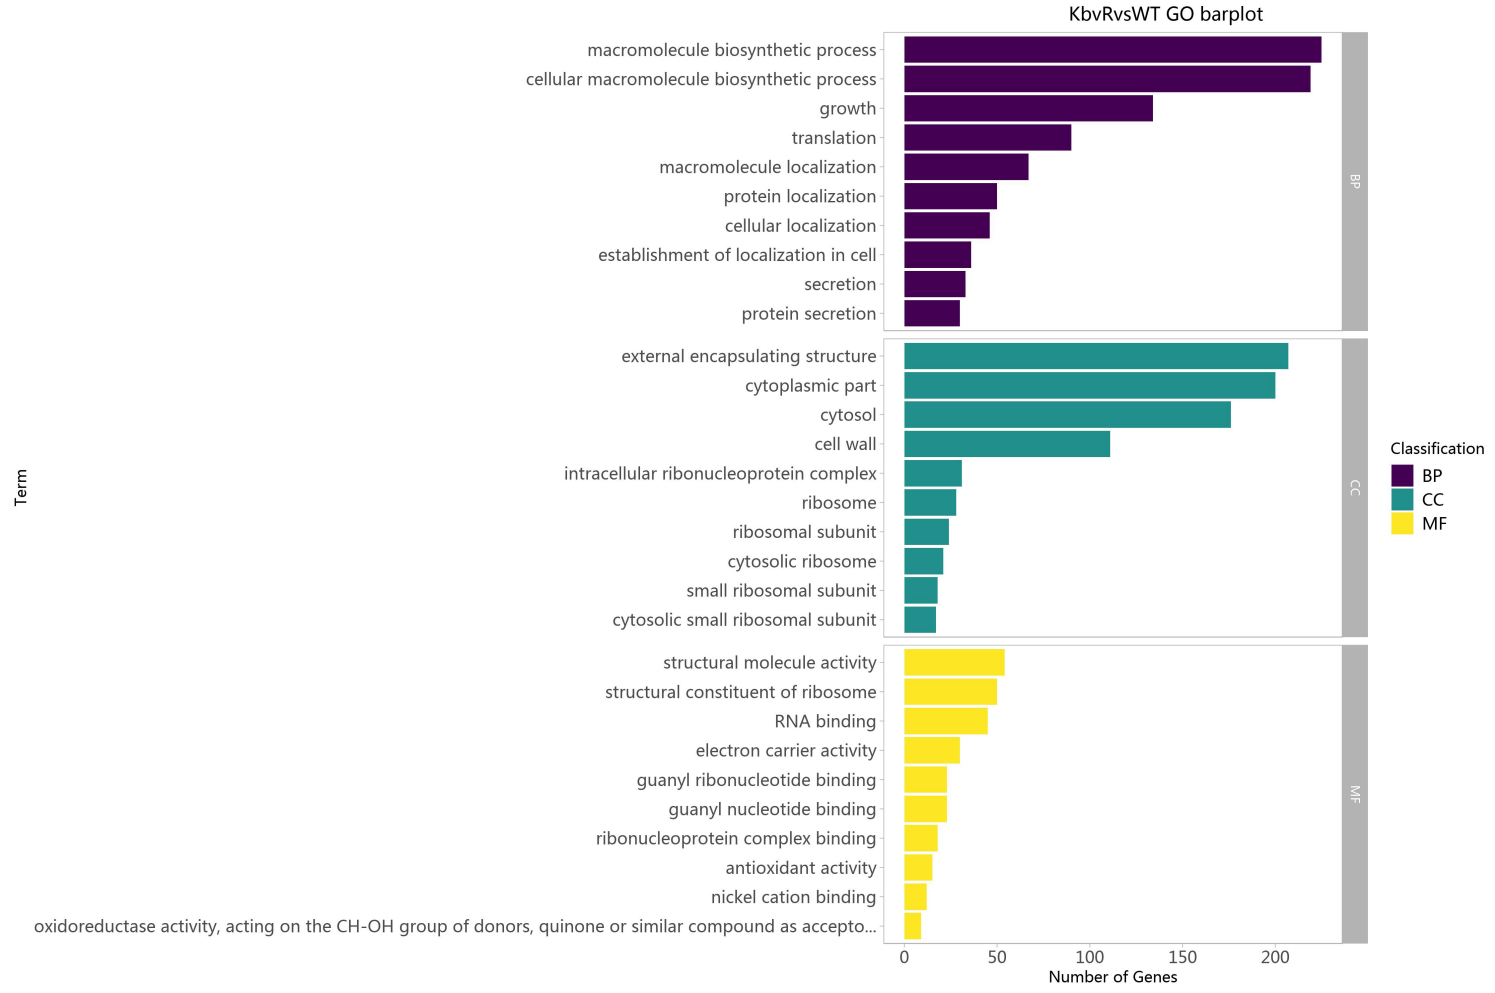

# Supplementary Figure S3

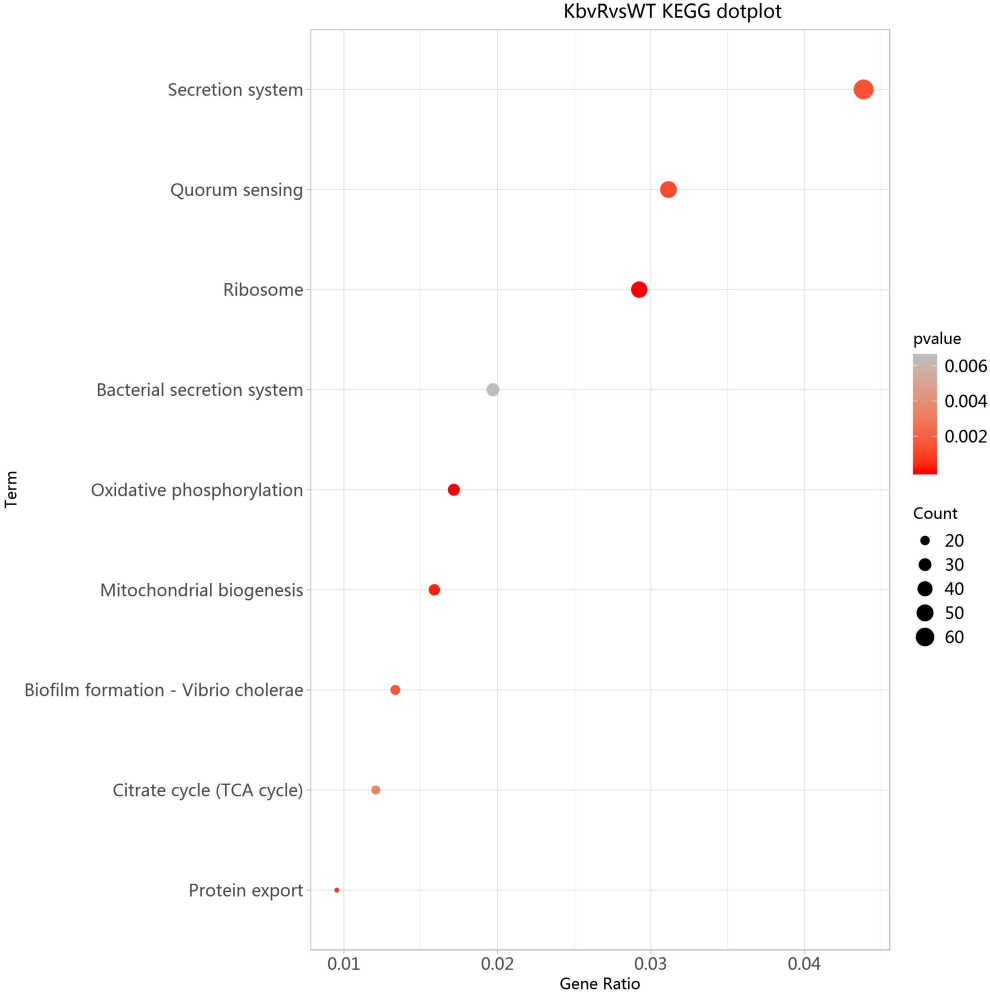

## Supplementary Table S1 Bacterial strains and plasmids used in this study

| Strains and plasmids        | Description                                                                                                                                   |
|-----------------------------|-----------------------------------------------------------------------------------------------------------------------------------------------|
| <b>Strains</b>              |                                                                                                                                               |
| <i>K. pneumoniae</i>        |                                                                                                                                               |
| NTUH K-2044 (WT)            | Wild-type strain; Ap <sup>r</sup>                                                                                                             |
| $\Delta KbvR$               | Deletion of <i>KbvR</i> from WT; Ap <sup>r</sup>                                                                                              |
| <i>C-KbvR</i>               | Complemented <i>KbvR</i> mutant; Ap <sup>r</sup> ; Km <sup>r</sup>                                                                            |
| NTUH K-2044 (WT)-GFP        | Wild-type strain with pLac-EGFP                                                                                                               |
| $\Delta KbvR$ -GFP          | Deletion of <i>KbvR</i> strain with pLac-EGFP                                                                                                 |
| <i>E. coli</i> DH5 $\alpha$ | F- $\phi$ 80 lac Z $\Delta$ M15 $\Delta$ (lac ZYA-arg F)U169 endA1 rec A1 hsd<br>R17(rk-,mk-) sup E44 $\lambda$ - thi -1 gyr A96 rel A1 pho A |
| <b>Plasmids</b>             |                                                                                                                                               |
| pKO <sub>3</sub> -Km        | pKO3-derived plasmid, with an insertion of Km resistance cassette from pUC4K into <i>AccI</i> site                                            |
| pGEM-T-easy-km              | pGEM-T easy with an insert of Km cassette from pUC4K into NdeI site for trans complementation                                                 |

## Supplementary Table S2 Primers used in this study

| Target gene                                | Primer sequences<br>(forward/reverse, 5'-3')                    | Purpose                                                                                                                                                                                     |
|--------------------------------------------|-----------------------------------------------------------------|---------------------------------------------------------------------------------------------------------------------------------------------------------------------------------------------|
| <b>Construction of mutant</b>              |                                                                 |                                                                                                                                                                                             |
| <i>KbvR</i>                                | GTATGCGGCCGCGTGGCGAGAGCGAAAAG<br>C/GTGAATGAATCGTTTTGGGAATAACTTC | Amplification of the 640 bp DNA fragment<br>upstream of the 612 bp target deletion<br>region                                                                                                |
|                                            | CCTGTGGGCATT                                                    | region                                                                                                                                                                                      |
| <i>KbvR</i>                                | AATGCCACAGGGAAGTTATTCCCAAAA<br>CGATTCATTAC/GTATGCGGCCGCTTCAA    | Amplification of the 584 bp DNA fragment<br>downstream of the 612 bp target deletion<br>region                                                                                              |
|                                            | CCAACCGTGATGTCC                                                 | region                                                                                                                                                                                      |
| <b>Construction of complemented mutant</b> |                                                                 |                                                                                                                                                                                             |
| <i>KbvR</i>                                | GAGT <u>CCATGGAAAACGAGCCAGAGGTA</u><br>G/GAGT                   | Amplification of 1693bp fragment<br>including the <i>KbvR</i> coding region with its<br>promoter-proximal region (889 bp<br>upstream the coding sequence) and<br>transcriptional terminator |
|                                            | <u>GTCGACATCAGGGTGGTTAGCATAG</u>                                |                                                                                                                                                                                             |
|                                            |                                                                 |                                                                                                                                                                                             |
| <b>Detection by RT-PCR</b>                 |                                                                 |                                                                                                                                                                                             |
| <i>KbvR</i>                                | GGACAATGAACACGCTACCG/CGCCGCAG<br>ACGATTGAAC                     | Amplification of a 165 bp intragenic<br>region of <i>KbvR</i>                                                                                                                               |

*magA* CGAAAGTGAACGAATTGATGCT/GTTTCT Amplification of a 121bp intragenic region  
GCTGCAGATTCGAAGA of *magA*

**16S rRNA** ATGACCAGCCACACTGGAAC/CTTCCTCCCC Amplification of a 151 bp intragenic  
**gene** GCTGAAAGTG region of the 16sRNA gene

---
