# Supplementary material
Source: PubMed Central journal article supplement (PMC8091090)
Supplement: IAI.00016-21-s0002.pdf [file IAI.00016-21-s0002.pdf]

| geneID                 | log2FoldChange | Annotation                                                                                               |
|------------------------|----------------|----------------------------------------------------------------------------------------------------------|
| gene2460 (KP1_RS12260) | -5.41926318    | transcriptional regulator                                                                                |
| gene4923 (KP1_RS24550) | -4.973296302   | Cold shock protein                                                                                       |
| gene228 (KP1_RS01110)  | -4.62740444    | This protein binds directly to 23S ribosomal RNA (By similarity)                                         |
| gene2446 (KP1_RS12185) | -4.482884445   | universal stress protein G                                                                               |
| gene2424 (KP1_RS12065) | -4.45234012    | Catalyzes the excretion of spermidine (By                                                                |
| gene2439 (KP1_RS12150) | -4.439544798   | Protein of unknown function (DUF1161)                                                                    |
| gene2442 (KP1_RS12165) | -4.422919978   | UPF0482 protein                                                                                          |
| gene4700 (KP1_RS23435) | -4.420234068   | Binds 16S rRNA, required for the assembly of 30S                                                         |
| gene4701 (KP1_RS23440) | -4.401606682   | This is 1 of the proteins that binds and probably mediates the attachment of the 5S RNA                  |
| gene2457 (KP1_RS12250) | -4.398069452   | Competence damage-inducible protein A                                                                    |
| gene3625 (KP1_RS18000) | -4.388425403   | membrane                                                                                                 |
| gene1849 (KP1_RS09230) | -4.356182692   | outer membrane protein a                                                                                 |
| gene3755 (KP1_RS18665) | -4.254259628   | Phosphocarrier protein Hpr                                                                               |
| gene81 (cpxP)          | -4.223362168   | periplasmic                                                                                              |
| gene1193 (KP1_RS05985) | -4.200704846   | (ubiquinol oxidase) subunit II                                                                           |
| gene4690 (KP1_RS23390) | -4.169711846   | Located on the platform of the 30S subunit, it                                                           |
| gene231 (KP1_RS01120)  | -4.161434116   | 50S ribosomal protein L10                                                                                |
| gene2411 (KP1_RS12005) | -4.159771563   | Inherit from COG: Specifically catalyzes the                                                             |
| gene4345 (KP1_RS21665) | -4.141026233   | fructose-bisphosphate aldolase                                                                           |
| gene4714 (KP1_RS23505) | -4.136731146   | Involved in the binding of tRNA to the ribosomes                                                         |
| gene2425 (KP1_RS12070) | -4.089144093   | Catalyzes the excretion of spermidine (By                                                                |
| gene2433 (KP1_RS12120) | -4.085097891   | Catalyzes a mechanistically unusual reaction, the ATP-dependent insertion of CO <sub>2</sub> between the |
| gene4702 (KP1_RS23445) | -4.075627889   | One of the proteins that surrounds the                                                                   |
| gene4121 (KP1_RS20525) | -4.070066989   | Catalyzes the reversible conversion of 2-                                                                |
| gene4699 (KP1_RS23430) | -4.064043301   | One of the primary rRNA binding proteins, it                                                             |
| gene4688 (KP1_RS23380) | -4.056318832   | DNA-dependent RNA polymerase catalyzes the                                                               |
| gene4697 (KP1_RS23420) | -4.050657262   | This is one of the proteins that binds and probably mediates the attachment of the 5S RNA                |
| gene229 (KP1_RS01115)  | -4.010757357   | Binds directly to 23S rRNA. The L1 stalk is                                                              |
| gene4720 (KP1_RS23535) | -3.992020422   | One of the primary rRNA binding proteins, it binds directly to 16S rRNA where it nucleates               |
| gene4028 (KP1_RS20055) | -3.990112968   | Can catalyze the hydrolysis of ATP in the presence of single-stranded DNA, the ATP-                      |
| gene1803 (KP1_RS09005) | -3.952587227   | thus facilitating recognition of the initiation                                                          |
| gene4582 (KP1_RS22870) | -3.932200232   | 50S ribosomal protein L27                                                                                |
| gene809 (KP1_RS04045)  | -3.91405047    | Binds directly to 16S ribosomal RNA (By                                                                  |
| gene4825 (KP1_RS24055) | -3.856680132   | Sigma factors are initiation factors that                                                                |
| gene1590 (KP1_RS07945) | -3.853911503   | dihydrolipoamide succinyltransferase                                                                     |
| gene4698 (KP1_RS23425) | -3.844802731   | This protein binds to the 23S rRNA, and is important in its secondary structure. It is                   |
| gene2089 (KP1_RS10410) | -3.831123915   | Serine protein kinase                                                                                    |
| gene5006 (KP1_RS24945) | -3.815472044   | Promotes RNA polymerase assembly. Latches the N-                                                         |
| gene4719 (KP1_RS23530) | -3.809883244   | Catalyzes the GTP-dependent ribosomal translocation step during translation                              |
| gene465 (KP1_RS02325)  | -3.806274003   | elongation. During this step, the ribosome                                                               |
| gene2243 (KP1_RS27670) | -3.801359368   | Binds together with S18 to 16S ribosomal RNA (By cold-shock protein                                      |
| gene4691 (KP1_RS23395) | -3.786692304   | Located at the top of the head of the 30S subunit, it contacts several helices of the 16S                |
| gene2093 (KP1_RS10430) | -3.771569334   | Catalyzes the NAD-dependent conversion of D-                                                             |

|                        |              |                                                                                                                                                                                                                             |
|------------------------|--------------|-----------------------------------------------------------------------------------------------------------------------------------------------------------------------------------------------------------------------------|
| gene2447 (KP1_RS12190) | -3.768517076 | transcriptional regulator                                                                                                                                                                                                   |
| gene4859 (KP1_RS24225) | -3.764024363 | universal stress protein A                                                                                                                                                                                                  |
| gene3617 (KP1_RS17960) | -3.757498117 | General inhibitor of pancreatic serine proteases                                                                                                                                                                            |
| gene4721 (KP1_RS23540) | -3.757377803 | Interacts with and stabilizes bases of the 16S rRNA that are involved in tRNA selection in the A site and with the mRNA backbone. Located at                                                                                |
| gene4689 (KP1_RS23385) | -3.732728156 | One of the primary rRNA binding proteins, it                                                                                                                                                                                |
| gene3072 (KP1_RS15315) | -3.730883928 | Binds directly to 23S ribosomal RNA and is necessary for the in vitro assembly process of                                                                                                                                   |
| gene4618 (KP1_RS23050) | -3.700502288 | This protein is one of the early assembly proteins of the 50S ribosomal subunit, although                                                                                                                                   |
| gene4687 (KP1_RS23375) | -3.698793822 | 50S ribosomal protein L17                                                                                                                                                                                                   |
| gene5153 (KP1_RS25700) | -3.67947122  | F(1)F(0) ATP synthase produces ATP from ADP in the presence of a proton or sodium gradient. F-type ATPases consist of two structural domains, however, it seems to stimulate more or less all (Ubiquinol oxidase) subunit I |
| gene1779 (KP1_RS08885) | -3.673749069 |                                                                                                                                                                                                                             |
| gene1594 (KP1_RS07965) | -3.67093733  |                                                                                                                                                                                                                             |
| gene1921 (KP1_RS09590) | -3.664939161 | phosphate starvation-inducible protein                                                                                                                                                                                      |
| gene4739 (KP1_RS23625) | -3.657727207 | CAMP-regulatory protein                                                                                                                                                                                                     |
| gene1191 (KP1_RS05975) | -3.655052524 | oxidase subunit III                                                                                                                                                                                                         |
| gene1591 (KP1_RS07950) | -3.643361426 | succinyl-CoA synthetase subunit beta                                                                                                                                                                                        |
| gene1963 (KP1_RS09780) | -3.637355787 | metal-binding, possibly nucleic acid-binding                                                                                                                                                                                |
| gene5020 (KP1_RS25015) | -3.636506062 | Key enzyme in the regulation of glycerol uptake                                                                                                                                                                             |
| gene403 (KP1_RS02010)  | -3.631706378 | Prevents misfolding and promotes the refolding                                                                                                                                                                              |
| gene1589 (KP1_RS07940) | -3.630833765 | 2-oxoglutarate dehydrogenase e1 component                                                                                                                                                                                   |
| gene3923 (KP1_RS19525) | -3.624480354 | Specifically methylates guanosine-37 in various                                                                                                                                                                             |
| gene2456 (KP1_RS12245) | -3.62427173  | Heat shock protein                                                                                                                                                                                                          |
| gene3075 (KP1_RS15330) | -3.604245911 | threonyl-tRNA synthetase                                                                                                                                                                                                    |
| gene3924 (rimM)        | -3.585265684 | An accessory protein needed during the final step in the assembly of 30S ribosomal subunit, possibly for assembly of the head region.                                                                                       |
| gene466 (KP1_RS02330)  | -3.573254376 | Binds single-stranded DNA at the primosome                                                                                                                                                                                  |
| gene4709 (KP1_RS23480) | -3.570333623 | Protein S19 forms a complex with S13 that binds                                                                                                                                                                             |
| gene3097 (KP1_RS15455) | -3.561477723 | DNA-binding protein H-ns                                                                                                                                                                                                    |
| gene4346 (KP1_RS21670) | -3.54381553  | phosphoglycerate kinase                                                                                                                                                                                                     |
| gene2448 (KP1_RS12195) | -3.540128754 | Dehydrogenase                                                                                                                                                                                                               |
| gene3074 (KP1_RS15325) | -3.539961412 | IF-3 binds to the 30S ribosomal subunit and shifts the equilibrium between 70S ribosomes and                                                                                                                                |
| gene4583 (KP1_RS22875) | -3.53314957  | This protein binds to 23S rRNA in the presence                                                                                                                                                                              |
| gene3912 (KP1_RS19465) | -3.528381206 | sigma 54 modulation protein ribosomal protein                                                                                                                                                                               |
| gene1850 (KP1_RS09235) | -3.527755991 | Component of the SOS system and an inhibitor of cell division. Accumulation of Sula causes rapid cessation of cell division and the appearance of                                                                           |
| gene4692 (KP1_RS28220) | -3.522343116 | 50S ribosomal protein L36                                                                                                                                                                                                   |
| gene4986 (KP1_RS24840) | -3.514804157 | 50S ribosomal protein L28                                                                                                                                                                                                   |
| gene5005 (KP1_RS24940) | -3.510035506 | Essential for recycling GMP and indirectly, cGMP                                                                                                                                                                            |
| gene1728 (bssR)        | -3.509968184 | Represses biofilm formation in M9C glu and LB glu media but not in M9C and LB media. Seems to                                                                                                                               |
| gene4718 (KP1_RS23525) | -3.496614444 | This protein promotes the GTP-dependent binding                                                                                                                                                                             |
| gene3925 (KP1_RS19535) | -3.486449877 | 30s ribosomal protein s16                                                                                                                                                                                                   |
| gene975 (KP1_RS04890)  | -3.484782493 | 30S ribosomal protein S2                                                                                                                                                                                                    |
| gene4572 (KP1_RS22820) | -3.484134584 | Preprotein translocase subunit SecG                                                                                                                                                                                         |
| gene4985 (KP1_RS24835) | -3.4778117   | 50S ribosomal protein L33                                                                                                                                                                                                   |

|                        |              |                                                                                                                                                                                               |
|------------------------|--------------|-----------------------------------------------------------------------------------------------------------------------------------------------------------------------------------------------|
| gene4693 (KP1_RS23400) | -3.471268282 | The central subunit of the protein translocation channel SecYEG. Consists of two halves formed by TMs 1-5 and 6-10. These two domains form a lateral gate at the front which open onto the    |
| gene452 (KP1_RS02260)  | -3.459091276 | UPF0379 protein yjfN                                                                                                                                                                          |
| gene4558 (KP1_RS22745) | -3.458377479 | Involved in mRNA degradation. Hydrolyzes single-                                                                                                                                              |
| gene2385 (KP1_RS11885) | -3.453898863 | Fumarate nitrate reduction transcriptional                                                                                                                                                    |
| gene3636 (KP1_RS18045) | -3.447552156 | glycerophosphoryl diester phosphodiesterase                                                                                                                                                   |
| gene5152 (KP1_RS25695) | -3.445007568 | F(1)F(0) ATP synthase produces ATP from ADP in the presence of a proton or sodium gradient. F-type ATPases consist of two structural domains, NDH-1 shuttles electrons from NADH, via FMN and |
| gene3669 (KP1_RS18215) | -3.435354015 | Formate dehydrogenase                                                                                                                                                                         |
| gene47 (KP1_RS00225)   | -3.421972477 | ATP-dependent RNA helicase                                                                                                                                                                    |
| gene4556 (KP1_RS22735) | -3.416577642 | Involved in the biosynthesis of lipid A, a                                                                                                                                                    |
| gene888 (KP1_RS04430)  | -3.414240433 | Cytochrome D ubiquinol oxidase, subunit II                                                                                                                                                    |
| gene1595 (KP1_RS07970) | -3.400314842 | Cold shock protein                                                                                                                                                                            |
| gene1506 (KP1_RS07535) | -3.394975389 | Seems to be the binding site for several of the                                                                                                                                               |
| gene232 (KP1_RS01125)  | -3.393514814 | Succinate dehydrogenase hydrophobic membrane                                                                                                                                                  |
| gene1586 (KP1_RS07925) | -3.392269798 | outer membrane protein x                                                                                                                                                                      |
| gene1702 (ompX)        | -3.387507606 | 30S ribosomal protein S21                                                                                                                                                                     |
| gene4454 (KP1_RS22215) | -3.380053909 | 30S ribosomal protein S9                                                                                                                                                                      |
| gene4617 (KP1_RS23045) | -3.366071203 | Catalyzes the formation of acetyl phosphate from                                                                                                                                              |
| gene3678 (KP1_RS18260) | -3.361948723 | Involved in protein export. Acts as a chaperone                                                                                                                                               |
| gene1197 (KP1_RS06005) | -3.355514932 | Succinyl-CoA ligase ADP-forming subunit alpha                                                                                                                                                 |
| gene1592 (KP1_RS07955) | -3.355404037 | Atp-dependent clp protease atp-binding subunit                                                                                                                                                |
| gene1778 (KP1_RS08880) | -3.35502348  | exported protein                                                                                                                                                                              |
| gene4510 (KP1_RS22490) | -3.351750212 | Diguanylate phosphodiesterase                                                                                                                                                                 |
| gene2458 (KP1_RS12255) | -3.34950273  | succinate dehydrogenase                                                                                                                                                                       |
| gene1588 (sdhB)        | -3.348600263 | Phosphoribosyl pyrophosphate synthase                                                                                                                                                         |
| gene3139 (KP1_RS15650) | -3.348508709 | Lysozyme inhibitor                                                                                                                                                                            |
| gene5413 (KP1_RS26925) | -3.345840645 | One of the primary rRNA binding proteins. Required for association of the 30S and 50S                                                                                                         |
| gene4710 (KP1_RS23485) | -3.3449768   | 50s ribosomal protein l32                                                                                                                                                                     |
| gene1964 (KP1_RS09785) | -3.343875891 | Lytic Murein transglycosylase                                                                                                                                                                 |
| gene1020 (KP1_RS05110) | -3.340257569 | Sigma factors are initiation factors that                                                                                                                                                     |
| gene4101 (KP1_RS20415) | -3.338130122 | Produces ATP from ADP in the presence of a                                                                                                                                                    |
| gene5151 (KP1_RS25690) | -3.329421904 | 50S ribosomal protein L30                                                                                                                                                                     |
| gene4695 (KP1_RS23410) | -3.328122963 | formate dehydrogenase, beta subunit                                                                                                                                                           |
| gene45 (KP1_RS00215)   | -3.326587244 | Produces ATP from ADP in the presence of a                                                                                                                                                    |
| gene5150 (KP1_RS25685) | -3.317651489 | proton gradient across the membrane. The gamma                                                                                                                                                |
| gene4790 (KP1_RS23875) | -3.315527451 | Glycerol-3-phosphate dehydrogenase                                                                                                                                                            |
| gene402 (groES)        | -3.312509384 | Binds to cpn60 in the presence of Mg-ATP and                                                                                                                                                  |
| gene148 (KP1_RS00705)  | -3.310377162 | Facilitates transcription termination by a                                                                                                                                                    |
| gene91 (KP1_RS00440)   | -3.304633942 | mechanism that involves Rho binding to the                                                                                                                                                    |
| gene2441 (KP1_RS12160) | -3.304403236 | Binds the 23S rRNA (By similarity)                                                                                                                                                            |
| gene2088 (KP1_RS10405) | -3.296732367 | spermidine N(1)-acetyltransferase                                                                                                                                                             |
| gene799 (KP1_RS03990)  | -3.291079313 | UPF0229 protein                                                                                                                                                                               |
| gene3637 (KP1_RS18050) | -3.285089404 | Transaldolase is important for the balance of                                                                                                                                                 |
| gene1796 (KP1_RS08970) | -3.279098513 | transporter                                                                                                                                                                                   |
| gene1618 (gpmA)        | -3.278109536 | Formate acetyltransferase                                                                                                                                                                     |
| gene985 (KP1_RS04935)  | -3.269637551 | Catalyzes the interconversion of 2-                                                                                                                                                           |
|                        |              | Molecular chaperone that interacts specifically with outer membrane proteins, thus maintaining                                                                                                |

|                        |              |                                                                                                                                           |
|------------------------|--------------|-------------------------------------------------------------------------------------------------------------------------------------------|
| gene3319 (KP1_RS16545) | -3.26877957  | response regulator                                                                                                                        |
| gene4922 (KP1_RS24545) | -3.267834514 | transcriptional regulator                                                                                                                 |
| gene3756 (KP1_RS18670) | -3.252598748 | General (non sugar-specific) component of the phosphoenolpyruvate-dependent sugar phosphotransferase system (sugar PTS). This             |
| gene1192 (KP1_RS05980) | -3.24921759  | oxidase) subunit I                                                                                                                        |
| gene4560 (KP1_RS22755) | -3.248538225 | One of the primary rRNA binding proteins, it binds directly to 16S rRNA where it helps                                                    |
| gene1982 (KP1_RS09875) | -3.244443551 | UPF0227 protein                                                                                                                           |
| gene3495 (KP1_RS17360) | -3.238383282 | utp--glucose-1-phosphate uridylyltransferase                                                                                              |
| gene1948 (bssS)        | -3.234363303 | Biofilm formation regulatory protein BssS                                                                                                 |
| gene2204 (KP1_RS11000) | -3.23408101  | phage shock protein B                                                                                                                     |
| gene2035 (KP1_RS10135) | -3.224958316 | Uncharacterized conserved protein (DUF2303)                                                                                               |
| gene1587 (KP1_RS07930) | -3.217836075 | succinate dehydrogenase, flavoprotein subunit                                                                                             |
| gene4696 (KP1_RS23415) | -3.213938781 | Located at the back of the 30S subunit body                                                                                               |
| gene2203 (KP1_RS10995) | -3.213533953 | Phage shock protein A                                                                                                                     |
| gene1189 (KP1_RS05965) | -3.197286206 | Converts heme B (protoheme IX) to heme O by                                                                                               |
| gene3922 (KP1_RS19520) | -3.194899437 | This protein is located at the 30S-50S ribosomal                                                                                          |
| gene224 (KP1_RS01095)  | -3.183338814 | This protein promotes the GTP-dependent binding                                                                                           |
| gene4680 (KP1_RS23345) | -3.18192826  | Modifies the free amino group of the aminoacyl moiety of methionyl-tRNA(fMet). The formyl group                                           |
| gene46 (KP1_RS00220)   | -3.178831594 | formate dehydrogenase, alpha subunit                                                                                                      |
| gene2555 (KP1_RS12725) | -3.176755584 | Iia component                                                                                                                             |
| gene5161 (KP1_RS28325) | -3.172926298 | Phosphoribosyl-amp cyclohydrolase                                                                                                         |
| gene4557 (KP1_RS22740) | -3.168307409 | May be involved in cell division (By similarity)                                                                                          |
| gene2177 (KP1_RS10855) | -3.154448296 | aconitate hydratase                                                                                                                       |
| gene4435 (KP1_RS22110) | -3.152374883 | Involved in glycogen synthesis. May be involved                                                                                           |
| gene3667 (KP1_RS18205) | -3.149832745 | NDH-1 shuttles electrons from NADH, via FMN and iron- sulfur (Fe-S) centers, to quinones in the respiratory chain. The immediate electron |
| gene789 (KP1_RS03945)  | -3.146191466 | two-component response regulator                                                                                                          |
| gene4024 (KP1_RS20040) | -3.145610273 | regulation of carbohydrate metabolic process                                                                                              |
| gene1789 (KP1_RS08935) | -3.145136692 | Catalyzes the attachment of serine to tRNA(Ser). Is also able to aminoacylate tRNA(Sec) with                                              |
| gene887 (KP1_RS04425)  | -3.142287988 | Essential cell division protein that forms a contractile ring structure (Z ring) at the                                                   |
| gene1585 (sdhC)        | -3.136361695 | future cell division site. The regulation of the Succinate dehydrogenase, cytochrome b556 subunit                                         |
| gene4676 (KP1_RS23325) | -3.134940116 | Dna topoisomerase                                                                                                                         |
| gene978 (KP1_RS04905)  | -3.133131818 | Responsible for the release of ribosomes from messenger RNA at the termination of protein                                                 |
| gene4102 (nlpD)        | -3.130271726 | lipoprotein NlpD                                                                                                                          |
| gene1526 (KP1_RS07630) | -3.122620027 | alpha helical protein                                                                                                                     |
| gene1559 (KP1_RS07790) | -3.122422839 | Ferric uptake                                                                                                                             |
| gene5412 (KP1_RS26920) | -3.120650848 | Removes the formyl group from the N-terminal Met of newly synthesized proteins. Requires at least                                         |
| gene4712 (KP1_RS23495) | -3.120225613 | One of the primary rRNA binding proteins, this protein initially binds near the 5'-end of the                                             |
| gene23 (KP1_RS00110)   | -3.119700898 | serine (threonine) protein kinase                                                                                                         |
| gene1583 (KP1_RS07915) | -3.112743621 | citrate synthase                                                                                                                          |
| gene4793 (KP1_RS23890) | -3.10931608  | Catalyzes the synthesis of ADP-glucose, a sugar                                                                                           |
| gene398 (KP1_RS01980)  | -3.108645207 | Aspartate ammonia-lyase                                                                                                                   |
| gene3757 (KP1_RS18675) | -3.103486603 | pts system                                                                                                                                |
| gene453 (KP1_RS02265)  | -3.102430951 | biofilm stress and motility protein A                                                                                                     |

|                        |              |                                                                                                                                                                                           |
|------------------------|--------------|-------------------------------------------------------------------------------------------------------------------------------------------------------------------------------------------|
| gene1190 (KP1_RS05970) | -3.10114647  | Cytochrome o ubiquinol oxidase, subunit IV                                                                                                                                                |
| gene1711 (KP1_RS08550) | -3.099457588 | abc transporter atp-binding protein                                                                                                                                                       |
| gene4713 (KP1_RS23500) | -3.098729024 | One of the primary rRNA binding proteins, it                                                                                                                                              |
| gene4675 (KP1_RS23320) | -3.092351147 | Required for the formation of a                                                                                                                                                           |
| gene4707 (KP1_RS23470) | -3.09039073  | Binds the lower part of the 30S subunit head.                                                                                                                                             |
| gene1603 (KP1_RS08010) | -3.085186099 | Peptidoglycan-associated lipoprotein                                                                                                                                                      |
| gene2492 (KP1_RS12425) | -3.080887111 | phenazine biosynthesis protein, PhzF family                                                                                                                                               |
| gene44 (KP1_RS00210)   | -3.079094188 | formate dehydrogenase                                                                                                                                                                     |
| gene4694 (KP1_RS23405) | -3.07745868  | Binds to the 23S rRNA (By similarity)                                                                                                                                                     |
| gene2103 (KP1_RS10475) | -3.073595843 | acid phosphatase                                                                                                                                                                          |
| gene908 (KP1_RS04540)  | -3.072337176 | dihydrolipoyl dehydrogenase                                                                                                                                                               |
| gene441 (KP1_RS02200)  | -3.071264965 | RNA chaperone that binds small regulatory RNA (sRNAs) and mRNAs to facilitate mRNA                                                                                                        |
| gene4342 (KP1_RS21645) | -3.069422042 | oxidative stress defense protein                                                                                                                                                          |
| gene4757 (KP1_RS23720) | -3.069049466 | Catalyzes the specific phosphorylation of the 3-NDH-1 shuttles electrons from NADH, via FMN and iron- sulfur (Fe-S) centers, to quinones in the respiratory chain. The immediate electron |
| gene3668 (KP1_RS18210) | -3.054513783 | exported protein                                                                                                                                                                          |
| gene1819 (KP1_RS09080) | -3.050507182 | Phosphotransfer between the C1 and C5 carbon                                                                                                                                              |
| gene770 (KP1_RS03860)  | -3.050077342 | Peptidyl-prolyl cis-trans isomerase                                                                                                                                                       |
| gene4726 (KP1_RS23565) | -3.044442435 | Inherit from proNOG: Acyl carrier protein                                                                                                                                                 |
| gene1969 (KP1_RS09810) | -3.044293353 | Involved in unsaturated fatty acids                                                                                                                                                       |
| gene987 (KP1_RS04945)  | -3.041422306 | biosynthesis. Catalyzes the dehydration of short                                                                                                                                          |
| gene988 (KP1_RS04950)  | -3.040631103 | Involved in the biosynthesis of lipid A, a                                                                                                                                                |
| gene2550 (KP1_RS12695) | -3.034115982 | Protein of unknown function (DUF3423)                                                                                                                                                     |
| gene1196 (KP1_RS06000) | -3.031349762 | BolA protein                                                                                                                                                                              |
| gene2145 (KP1_RS10700) | -3.028696848 | outer membrane protein W                                                                                                                                                                  |
| gene981 (KP1_RS04915)  | -3.028010276 | Catalyzes the sequential condensation of isopentenyl diphosphate (IPP) with (2E,6E)-farnesyl diphosphate (E,E-FPP) to yield                                                               |
| gene1199 (KP1_RS06015) | -3.026594314 | ATP-dependent specificity component of the Clp                                                                                                                                            |
| gene1596 (KP1_RS07975) | -3.025830083 | Cyd operon protein YbgT                                                                                                                                                                   |
| gene3054 (KP1_RS15225) | -3.023592014 | Catalyzes the phosphorylation of pyruvate to                                                                                                                                              |
| gene4728 (KP1_RS23575) | -3.017809527 | Peptidyl-prolyl cis-trans isomerase                                                                                                                                                       |
| gene4122 (pyrG)        | -3.014837371 | Catalyzes the ATP-dependent amination of UTP to                                                                                                                                           |
| gene3253 (KP1_RS16225) | -3.014807179 | Protein of unknown function (DUF1480)                                                                                                                                                     |
| gene4565 (KP1_RS22780) | -3.012520422 | Required for maturation of 30S ribosomal                                                                                                                                                  |
| gene5154 (KP1_RS25705) | -3.011555552 | F(1)F(0) ATP synthase produces ATP from ADP in the presence of a proton or sodium gradient. F-type ATPases consist of two structural domains,                                             |
| gene4634 (KP1_RS23130) | -3.001383779 | UPF0379 protein yhcN                                                                                                                                                                      |
| gene4511 (KP1_RS22495) | -3.000099839 | conserved protein                                                                                                                                                                         |
| gene35 (KP1_RS00165)   | -2.995699155 | gtp-binding protein typA                                                                                                                                                                  |
| gene4320 (KP1_RS21535) | -2.993769948 | hemolysin III                                                                                                                                                                             |
| gene3890 (KP1_RS19350) | -2.986314042 | sigma-e factor negative regulatory protein                                                                                                                                                |
| gene2985 (KP1_RS14870) | -2.985003499 | Protein of unknown function (DUF1062)                                                                                                                                                     |
| gene1256 (KP1_RS06305) | -2.979531866 | Catalyzes the reversible transfer of the terminal phosphate group between ATP and AMP.                                                                                                    |
| gene3772 (KP1_RS18755) | -2.978989555 | N-acetylmuramoyl-L-alanine amidase                                                                                                                                                        |
| gene443 (KP1_RS02210)  | -2.96727416  | HflK protein                                                                                                                                                                              |
| gene4677 (KP1_RS23330) | -2.966022979 | Protein smg homolog                                                                                                                                                                       |
| gene3024 (KP1_RS15075) | -2.963897995 | outer membrane lipoprotein                                                                                                                                                                |

|                        |              |                                                                                                                                     |
|------------------------|--------------|-------------------------------------------------------------------------------------------------------------------------------------|
| gene841 (KP1_RS04195)  | -2.960251059 | Transfers 2-(5'-triphosphoribosyl)-3'-dephosphocoenzyme-A on a serine residue to the                                                |
| gene4708 (KP1_RS23475) | -2.956882852 | The globular domain of the protein is located near the polypeptide exit tunnel on the outside                                       |
| gene373 (KP1_RS01840)  | -2.952790829 | proline glycine betaine transporter                                                                                                 |
| gene1323 (KP1_RS06640) | -2.947095291 | Protein of unknown function (DUF1471)                                                                                               |
| gene2877 (KP1_RS14330) | -2.947043471 | Destroys radicals which are normally produced                                                                                       |
| gene4575 (hf1B)        | -2.946294594 | Acts as a processive, ATP-dependent zinc                                                                                            |
| gene3068 (KP1_RS15300) | -2.944565845 | This protein is one of the two subunits of integration host factor, a specific DNA-binding                                          |
| gene299 (KP1_RS01455)  | -2.943118758 | CsbD family                                                                                                                         |
| gene2026 (KP1_RS10105) | -2.942838354 | isocitrate dehydrogenase (NADP)                                                                                                     |
| gene84 (KP1_RS00400)   | -2.94261712  | Globally modulates RNA abundance by binding to RNase E (Rne) and regulating its endonucleolytic                                     |
| gene146 (KP1_RS00700)  | -2.938728368 | Thioredoxin                                                                                                                         |
| gene2732 (KP1_RS13615) | -2.936585033 | alcohol dehydrogenase                                                                                                               |
| gene4433 (KP1_RS22100) | -2.929657989 | Catalyzes the conversion of D-ribulose 5-                                                                                           |
| gene4512 (KP1_RS22500) | -2.9215628   | Inner membrane protein YqjE                                                                                                         |
| gene1239 (KP1_RS06215) | -2.921177158 | Inner membrane protein ylaC                                                                                                         |
| gene4615 (sspA)        | -2.912396684 | Stringent starvation protein a                                                                                                      |
| gene1631 (KP1_RS08155) | -2.909935149 | Biofilm development protein YmgB/AriR                                                                                               |
| gene1201 (KP1_RS06025) | -2.906593175 | DNA-binding protein                                                                                                                 |
| gene1848 (KP1_RS09225) | -2.905629687 | Required for spatial organization of the terminus region of the chromosome (Ter                                                     |
| gene5014 (KP1_RS24985) | -2.903249139 | Triose-phosphate isomerase                                                                                                          |
| gene3098 (KP1_RS15460) | -2.899269181 | Utp--glucose-1-phosphate uridylyltransferase                                                                                        |
| gene5364 (KP1_RS26715) | -2.896063282 | tellurium resistance protein                                                                                                        |
| gene4679 (KP1_RS23340) | -2.895260189 | Removes the formyl group from the N-terminal Met of newly synthesized proteins. Requires at least                                   |
| gene1700 (KP1_RS08490) | -2.892878455 | During stationary phase, binds the chromosome non-specifically, forming a highly ordered and stable dps-DNA co-crystal within which |
| gene3080 (KP1_RS15355) | -2.886463746 | Fructosamine kinase                                                                                                                 |
| gene467 (KP1_RS02335)  | -2.884782252 | Binds as a heterodimer with protein S6 to the                                                                                       |
| gene24 (KP1_RS00115)   | -2.881605363 | Thiol disulfide Interchange Protein                                                                                                 |
| gene422 (KP1_RS02105)  | -2.880708087 | fumarate reductase iron-sulfur                                                                                                      |
| gene3597 (KP1_RS17860) | -2.878764652 | (Lipo)protein                                                                                                                       |
| gene4620 (KP1_RS23060) | -2.869877811 | Cytochrome d ubiquinol oxidase subunit III                                                                                          |
| gene976 (KP1_RS04895)  | -2.864304641 | Associates with the EF-Tu.GDP complex and induces the exchange of GDP to GTP. It remains                                            |
| gene4330 (KP1_RS21585) | -2.86215586  | The glycine cleavage system catalyzes the                                                                                           |
| gene984 (KP1_RS04930)  | -2.861722109 | Part of the outer membrane protein assembly                                                                                         |
| gene1198 (KP1_RS06010) | -2.858923261 | Cleaves peptides in various proteins in a process that requires ATP hydrolysis. Has a                                               |
| gene2874 (KP1_RS14315) | -2.858608808 | Glutaredoxin                                                                                                                        |
| gene4329 (KP1_RS21580) | -2.858296441 | The glycine cleavage system catalyzes the                                                                                           |
| gene1785 (KP1_RS08915) | -2.858292006 | Transcriptional regulator                                                                                                           |
| gene2094 (KP1_RS10435) | -2.85503633  | peptide-methionine (R)-S-oxide reductase                                                                                            |
| gene974 (KP1_RS04885)  | -2.853351233 | Removes the N-terminal methionine from nascent                                                                                      |
| gene934 (KP1_RS04675)  | -2.852433868 | Transcription factor that acts by binding directly to the RNA polymerase (RNAP). Required                                           |
| gene312 (KP1_RS01525)  | -2.852344327 | single-stranded DNA-binding protein                                                                                                 |
| gene1787 (lolA)        | -2.851346105 | Participates in the translocation of lipoproteins from the inner membrane to the                                                    |

|                        |              |                                                                                               |
|------------------------|--------------|-----------------------------------------------------------------------------------------------|
| gene2561 (KP1_RS12760) | -2.849120064 | transcriptional regulator                                                                     |
| gene5019 (KP1_RS25010) | -2.847364561 | glycerol uptake facilitator protein                                                           |
| gene3237 (KP1_RS16155) | -2.845942679 | Cold shock protein                                                                            |
| gene297 (KP1_RS01440)  | -2.841697008 | Represses a number of genes involved in the response to DNA damage (SOS response), including  |
| gene771 (KP1_RS03865)  | -2.830293089 | purine nucleoside phosphorylase DeoD-type                                                     |
| gene4009 (KP1_RS19955) | -2.828262211 | Transcriptional repressor Mpra                                                                |
| gene2690 (KP1_RS13405) | -2.820377678 | Bifunctional enzyme with both catalase and                                                    |
| gene4563 (KP1_RS22770) | -2.81963867  | One of the essential components for the initiation of protein synthesis. Protects             |
| gene3248 (KP1_RS16200) | -2.817936943 | may be a structural element that influences the                                               |
| gene1633 (KP1_RS08165) | -2.81431765  | Probably a connector protein for RcsB C regulation of biofilm formation, providing            |
| gene2302 (KP1_RS11470) | -2.814107013 | Universal stress protein                                                                      |
| gene906 (KP1_RS04530)  | -2.81314049  | Component of the pyruvate dehydrogenase (PDH)                                                 |
| gene3206 (KP1_RS15995) | -2.81311163  | SpoVR family                                                                                  |
| gene4791 (KP1_RS23880) | -2.811933677 | Phosphorylase is an important allosteric enzyme in carbohydrate metabolism. Enzymes from      |
| gene3836 (KP1_RS19075) | -2.8113263   | UPF0070 protein                                                                               |
| gene3895 (KP1_RS19375) | -2.810917555 | Acts as a radical domain for damaged PFL and                                                  |
| gene5247 (KP1_RS26205) | -2.810194698 | Transcriptional regulator                                                                     |
| gene964 (KP1_RS04835)  | -2.806744054 | Required for insertion of 4Fe-4S clusters for at                                              |
| gene3297 (KP1_RS16440) | -2.806021704 | Trehalose-6-phosphate phosphatase                                                             |
| gene2440 (KP1_RS12155) | -2.804518432 | UPF0257 lipoprotein ynfC                                                                      |
| gene2383 (KP1_RS11875) | -2.804435481 | uncharacterized protein ydiH                                                                  |
| gene2506 (KP1_RS12495) | -2.793714462 | GGDEF                                                                                         |
| gene3854 (KP1_RS19165) | -2.793307262 | Catalyzes the removal of elemental sulfur from                                                |
| gene3577 (KP1_RS17770) | -2.787637194 | GTP cyclohydrolase I                                                                          |
| gene1970 (KP1_RS09815) | -2.786329095 | Catalyzes the condensation reaction of fatty                                                  |
| gene1777 (KP1_RS08875) | -2.785382375 | Involved in the modulation of the specificity of                                              |
| gene3891 (KP1_RS19355) | -2.780108794 | RNA polymerase sigma factor                                                                   |
| gene4597 (KP1_RS22945) | -2.774679318 | lipopolysaccharide transport periplasmic protein                                              |
| gene2484 (KP1_RS12380) | -2.774187978 | helix-turn-helix domain protein                                                               |
| gene1648 (KP1_RS08245) | -2.772231563 | Imidazolonepropionate hydrolase                                                               |
| gene3607 (KP1_RS17910) | -2.772031345 | This is one of the proteins that binds to the 5S                                              |
| gene4425 (KP1_RS22060) | -2.771903852 | Hydrolyzes cAMP to 5'-AMP. Plays an important                                                 |
| gene969 (KP1_RS04860)  | -2.770604959 | protease                                                                                      |
| gene203 (KP1_RS01000)  | -2.770301062 | reductase                                                                                     |
| gene874 (KP1_RS04360)  | -2.76998713  | Specifically methylates the N4 position of                                                    |
| gene3933 (KP1_RS19575) | -2.769302165 | Part of the outer membrane protein assembly                                                   |
| gene5018 (KP1_RS25005) | -2.769062742 | Non-essential, abundant cell division factor that is required for proper Z-ring formation. It |
| gene4589 (KP1_RS22905) | -2.768527818 | toluene tolerance                                                                             |
| gene2384 (KP1_RS11880) | -2.767822296 | Universal stress protein                                                                      |
| gene4564 (nusA)        | -2.764935713 | Transcription elongation factor NusA                                                          |
| gene1509 (tatE)        | -2.757573059 | Part of the twin-arginine translocation (Tat) system that transports large folded proteins    |
| gene2861 (KP1_RS14250) | -2.757530538 | Outer membrane lipoprotein                                                                    |
| gene22 (KP1_RS00105)   | -2.757004438 | conserved protein                                                                             |
| gene194 (KP1_RS00950)  | -2.746339114 | Methyltransferase required for the conversion of demethylmenaquinone (DMKH2) to menaquinone   |
| gene1499 (KP1_RS07500) | -2.745522175 | alkyl hydroperoxide reductase                                                                 |
| gene3448 (KP1_RS17125) | -2.744583415 | Inhibits the supercoiling activity of DNA gyrase. Acts by inhibiting DNA gyrase at an         |

|                        |              |                                                                                                 |
|------------------------|--------------|-------------------------------------------------------------------------------------------------|
| gene4706 (KP1_RS23465) | -2.743365585 | Binds 23S rRNA and is also seen to make contacts                                                |
| gene3713 (KP1_RS18445) | -2.742134179 | phosphohistidine phosphatase                                                                    |
| gene2452 (KP1_RS12215) | -2.737843886 | Uncharacterised ACR, COG2135                                                                    |
| gene4705 (KP1_RS23460) | -2.737487904 | 50S ribosomal protein L29                                                                       |
| gene3629 (KP1_RS18020) | -2.734235606 | DNA gyrase negatively supercoils closed circular double-stranded DNA in an ATP-dependent manner |
| gene3177 (KP1_RS15845) | -2.723115525 | phosphoenolpyruvate carboxylase                                                                 |
| gene442 (KP1_RS02205)  | -2.722773167 | GTPase that associates with the 50S ribosomal                                                   |
| gene3144 (KP1_RS15675) | -2.722679739 | GTP-dependent nucleic acid-binding protein engD                                                 |
| gene2946 (KP1_RS14690) | -2.722381914 | Phage-related regulatory protein cII                                                            |
| gene227 (nusG)         | -2.721599862 | Participates in transcription elongation,                                                       |
| gene3936 (KP1_RS19590) | -2.721368011 | Binds specifically to the SsrA RNA (tmRNA) and                                                  |
| gene5371 (KP1_RS26745) | -2.720658875 | DNA-invertase from lambdoid prophage                                                            |
| gene415 (KP1_RS02070)  | -2.718823778 | Involved in peptide bond synthesis. Alleviates ribosome stalling that occurs when 3 or more     |
| gene3704 (KP1_RS18400) | -2.717706727 | Catalyzes the condensation reaction of fatty                                                    |
| gene5155 (KP1_RS25710) | -2.713633464 | it plays a direct role in the translocation of                                                  |
| gene1634 (KP1_RS08170) | -2.713396057 | Diguanylate phosphodiesterase                                                                   |
| gene3494 (KP1_RS17355) | -2.712270704 | phosphoesterase, PA-phosphatase related protein                                                 |
| gene5119 (KP1_RS25520) | -2.711871678 | DNA gyrase negatively supercoils closed circular double-stranded DNA in an ATP-dependent manner |
| gene2859 (KP1_RS14240) | -2.709079979 | (Lip0)protein                                                                                   |
| gene251 (KP1_RS01220)  | -2.704757837 | DNA-binding protein                                                                             |
| gene488 (KP1_RS02440)  | -2.702982209 | pyrophosphate phospho-hydrolase                                                                 |
| gene5363 (KP1_RS26710) | -2.69711078  | tellurium resistance protein                                                                    |
| gene3491 (KP1_RS17335) | -2.694320682 | protein tyrosine phosphatase                                                                    |
| gene43 (KP1_RS00205)   | -2.693090479 | Necessary for formate dehydrogenase activity (By                                                |
| gene1 (KP1_RS00005)    | -2.690133715 | Flavodoxin                                                                                      |
| gene839 (KP1_RS04185)  | -2.686155281 | citrate carrier protein                                                                         |
| gene1902 (KP1_RS09490) | -2.684555348 | NAD(P)H quinone oxidoreductase                                                                  |
| gene5341 (KP1_RS26610) | -2.684229949 | Protein of unknown function (DUF1778)                                                           |
| gene3639 (KP1_RS18060) | -2.683122969 | Conversion of glycerol 3-phosphate to                                                           |
| gene1534 (KP1_RS07675) | -2.683004043 | Magnesium and cobalt efflux protein                                                             |
| gene4632 (KP1_RS23120) | -2.68037053  | Catalyzes the reversible oxidation of malate to                                                 |
| gene1968 (fabG)        | -2.676962131 | reductase                                                                                       |
| gene440 (KP1_RS02195)  | -2.67219743  | Catalyzes the transfer of a dimethylallyl group onto the adenine at position 37 in tRNAs that   |
| gene3837 (KP1_RS19080) | -2.671141689 | histidyl-tRNA synthetase                                                                        |
| gene5125 (KP1_RS25540) | -2.670969241 | 50s ribosomal protein l34                                                                       |
| gene763 (KP1_RS03825)  | -2.669380851 | BON                                                                                             |
| gene5149 (KP1_RS25680) | -2.668271059 | Produces ATP from ADP in the presence of a                                                      |
| gene1560 (KP1_RS07795) | -2.66689456  | Low-potential electron donor to a number of                                                     |
| gene1649 (KP1_RS08250) | -2.665620426 | Histidine ammonia-lyase                                                                         |
| gene3023 (KP1_RS15070) | -2.664829448 | Pyruvate kinase                                                                                 |
| gene2590 (KP1_RS12895) | -2.664237822 | LysM domain BON superfamily protein                                                             |
| gene3638 (KP1_RS18055) | -2.661447632 | dehydrogenase, subunit A                                                                        |
| gene1242 (KP1_RS06235) | -2.661059678 | Biofilm formation regulator YbaJ                                                                |
| gene4970 (KP1_RS24760) | -2.660320914 | Catalyzes the interconversion between ADP-D-                                                    |
| gene805 (KP1_RS04020)  | -2.659864477 | Acts as a chaperone (By similarity)                                                             |
| gene3479 (KP1_RS17285) | -2.6593155   | Catalyzes the oxidative decarboxylation of 6-                                                   |
| gene4792 (KP1_RS23885) | -2.659262351 | Synthesizes alpha-1,4-glucan chains using ADP-                                                  |
| gene2126 (KP1_RS10600) | -2.658046476 | DNA-binding transcriptional activator OsmE                                                      |
| gene3848 (KP1_RS19135) | -2.657946582 | Fe-S assembly protein IscX                                                                      |
| gene423 (KP1_RS02110)  | -2.657835944 | succinate dehydrogenase, flavoprotein subunit                                                   |



|                        |              |                                                                                                                                      |
|------------------------|--------------|--------------------------------------------------------------------------------------------------------------------------------------|
| gene1127 (KP1_RS05645) | -2.647155047 | starvation-inducible protein                                                                                                         |
| gene3086 (KP1_RS15390) | -2.645482019 | UPF0263 protein                                                                                                                      |
| gene2461 (KP1_RS12265) | -2.645052652 | Regulatory protein                                                                                                                   |
| gene3485 (KP1_RS28050) | -2.643882515 | Bacterial transferase hexapeptide (six repeats)                                                                                      |
| gene1200 (KP1_RS06020) | -2.64374803  | ATP-dependent serine protease that mediates the selective degradation of mutant and abnormal proteins as well as certain short-lived |
| gene2863 (KP1_RS14260) | -2.643425043 | Transcription regulator that can specifically                                                                                        |
| gene3785 (KP1_RS18820) | -2.643245258 | May be involved in the formation of a specific                                                                                       |
| gene3884 (KP1_RS19315) | -2.640633011 | An essential GTPase that binds both GDP and GTP, with rapid nucleotide exchange. Plays a role in                                     |
| gene986 (1pxD)         | -2.634992028 | as the acyl donor. Is involved in the                                                                                                |
| gene2931 (KP1_RS14610) | -2.633821753 | Protein of unknown function (DUF535)                                                                                                 |
| gene4331 (KP1_RS21590) | -2.633488297 | The glycine cleavage system catalyzes the                                                                                            |
| gene2509 (KP1_RS12510) | -2.632413931 | Acetyltransferase (GNAT) family                                                                                                      |
| gene5156 (KP1_RS25715) | -2.628802588 | Produces ATP from ADP in the presence of a                                                                                           |
| gene236 (KP1_RS01145)  | -2.627013198 | phosphotransferase system PTS, lactose                                                                                               |
| gene226 (KP1_RS01100)  | -2.624459053 | preprotein translocase subunit SecE                                                                                                  |
| gene447 (KP1_RS02235)  | -2.622514543 | Plays an important role in the de novo pathway                                                                                       |
| gene3889 (KP1_RS19345) | -2.617759022 | regulatory protein                                                                                                                   |
| gene1178 (KP1_RS05910) | -2.617673739 | UPF0234 protein                                                                                                                      |
| gene4716 (KP1_RS23515) | -2.617011449 | Iron-storage protein                                                                                                                 |
| gene3483 (KP1_RS17305) | -2.615464837 | GDP-fucose synthetase                                                                                                                |
| gene3829 (KP1_RS19040) | -2.615253829 | Catalyzes the synthesis of GMP from XMP (By                                                                                          |
| gene3492 (KP1_RS17340) | -2.613250868 | polysaccharide export protein                                                                                                        |
| gene4347 (KP1_RS21675) | -2.607223425 | Catalyzes the NAD-dependent conversion of D-                                                                                         |
| gene1524 (KP1_RS07620) | -2.604711365 | Rare lipoprotein B                                                                                                                   |
| gene4836 (KP1_RS24110) | -2.603201947 | (Lipo)protein                                                                                                                        |
| gene4018 (KP1_RS20005) | -2.600463519 | Transport-associated protein                                                                                                         |
| gene170 (KP1_RS00825)  | -2.598905844 | Adenylate cyclase                                                                                                                    |
| gene1215 (KP1_RS06095) | -2.598851842 | Glycoprotein polysaccharide metabolism                                                                                               |
| gene3484 (KP1_RS17310) | -2.597771967 | GDPmannose 4,6-dehydratase                                                                                                           |
| gene3135 (KP1_RS15635) | -2.597558413 | Catalyzes the NADPH-dependent reduction of                                                                                           |
| gene3025 (KP1_RS15080) | -2.596573012 | ErfK YbiS YcfS YnhG family protein                                                                                                   |
| gene971 (KP1_RS04870)  | -2.594904369 | UPF0325 protein                                                                                                                      |
| gene2882 (KP1_RS14360) | -2.593207396 | cyclopropane-fatty-acyl-phospholipid synthase                                                                                        |
| gene3807 (KP1_RS18925) | -2.592385408 | Catalyzes the condensation of (S)-aspartate-                                                                                         |
| gene1599 (KP1_RS07990) | -2.588332041 | tolQ protein                                                                                                                         |
| gene3627 (KP1_RS18010) | -2.58690418  | regulator                                                                                                                            |
| gene4507 (KP1_RS22475) | -2.586051636 | Transcriptional regulator                                                                                                            |
| gene873 (KP1_RS04355)  | -2.582435856 | cell division protein MraZ                                                                                                           |
| gene234 (KP1_RS01135)  | -2.58115707  | DNA-dependent RNA polymerase catalyzes the                                                                                           |
| gene2345 (KP1_RS11670) | -2.575803681 | Glutamate dehydrogenase                                                                                                              |
| gene1635 (KP1_RS08175) | -2.573694557 | Transcriptional regulator                                                                                                            |
| gene381 (KP1_RS01880)  | -2.573267144 | displays overlapping activities with DnaJ, but functions under different conditions, probably                                        |
| gene3697 (KP1_RS18365) | -2.57296934  | Component of the acetyl coenzyme A carboxylase (ACC) complex. Biotin carboxylase (BC) catalyzes                                      |
| gene4317 (KP1_RS21520) | -2.569580779 | Toxic component of a toxin-antitoxin (TA)                                                                                            |
| gene4704 (KP1_RS23455) | -2.569469343 | module. Overexpression leads to growth arrest                                                                                        |
| gene92 (KP1_RS00445)   | -2.567581862 | One of the primary rRNA binding proteins, it                                                                                         |
| gene4119 (KP1_RS20510) | -2.565175181 | This regulatory protein, when combined with SAM                                                                                      |
| gene4439 (KP1_RS22135) | -2.564970638 | Catalyzes the conversion of 6-carboxy-5,6,7,8-                                                                                       |
|                        |              | domain protein                                                                                                                       |

|                        |               |                                                                                                                                           |
|------------------------|---------------|-------------------------------------------------------------------------------------------------------------------------------------------|
| gene3079 (KP1_RS15350) | -2. 563698553 | Uncharacterized protein ydiZ                                                                                                              |
| gene4614 (KP1_RS23035) | -2. 562663451 | stringent starvation protein b                                                                                                            |
| gene5370 (KP1_RS26740) | -2. 561278203 | alpha beta fold family                                                                                                                    |
| gene3486 (KP1_RS17315) | -2. 556989904 | glycosyl transferase group 1                                                                                                              |
| gene3838 (KP1_RS19085) | -2. 552063775 | Converts 2C-methyl-D-erythritol 2,4-                                                                                                      |
| gene4576 (KP1_RS22840) | -2. 550586843 | Specifically methylates the uridine in position                                                                                           |
| gene4355 (KP1_RS21710) | -2. 544074198 | Catalyzes the formation of S-adenosylmethionine from methionine and ATP. The overall synthetic                                            |
| gene1598 (KP1_RS07985) | -2. 544066187 | Thioesterase                                                                                                                              |
| gene2857 (KP1_RS14230) | -2. 543801712 | Catalyzes the attachment of tyrosine to tRNA(Tyr) in a two-step reaction tyrosine is                                                      |
| gene1253 (KP1_RS06290) | -2. 542311453 | Binds to DNA and alters its conformation. May be                                                                                          |
| gene1858 (KP1_RS09275) | -2. 535221039 | Involved in the degradation of certain                                                                                                    |
| gene2449 (KP1_RS12200) | -2. 534338645 | peptidyl-dipeptidase Dcp                                                                                                                  |
| gene2552 (KP1_RS12705) | -2. 532303657 | Diguanylate cyclase phosphodiesterase                                                                                                     |
| gene3482 (KP1_RS17300) | -2. 530934376 | GDP-mannose mannosyl hydrolase                                                                                                            |
| gene499 (KP1_RS02505)  | -2. 53033983  | Cytochrome b(562)                                                                                                                         |
| gene2095 (KP1_RS10440) | -2. 528154806 | cytoplasmic protein                                                                                                                       |
| gene3476 (KP1_RS17270) | -2. 527969041 | UDP-glucose 6-dehydrogenase                                                                                                               |
| gene3446 (KP1_RS17115) | -2. 527690997 | UPF0265 protein                                                                                                                           |
| gene3666 (KP1_RS18200) | -2. 527237357 | NADH dehydrogenase subunit E                                                                                                              |
| gene4562 (KP1_RS22765) | -2. 526851871 | Associates with free 30S ribosomal subunits (but not with 30S subunits that are part of 70S                                               |
| gene3247 (KP1_RS16195) | -2. 526534452 | protease                                                                                                                                  |
| gene112 (KP1_RS00535)  | -2. 525981601 | Transcriptional regulator                                                                                                                 |
| gene3265 (KP1_RS16285) | -2. 523349345 | DNA damage-inducible protein                                                                                                              |
| gene493 (KP1_RS02470)  | -2. 522947459 | D-fructose-1,6-bisphosphate 1-phosphohydrolase                                                                                            |
| gene300 (KP1_RS01460)  | -2. 522769363 | Zinc uptake regulation protein                                                                                                            |
| gene2124 (KP1_RS10590) | -2. 522318832 | Incises the DNA at the 3' side of a lesion during nucleotide excision repair. Incises the DNA farther away from the lesion than UvrC. Not |
| gene233 (KP1_RS01130)  | -2. 521800637 | DNA-dependent RNA polymerase catalyzes the                                                                                                |
| gene2413 (KP1_RS12015) | -2. 521779075 | Transcriptional regulator                                                                                                                 |
| gene421 (KP1_RS02100)  | -2. 521212329 | Seems to be involved in the anchoring of the                                                                                              |
| gene3529 (KP1_RS17535) | -2. 518280486 | fructose-bisphosphate aldolase                                                                                                            |
| gene1646 (KP1_RS08235) | -2. 517241109 | Formiminoglutamate hydrolase                                                                                                              |
| gene173 (KP1_RS00840)  | -2. 515717211 | Catalyzes the stereoinversion of LL-2,6-diaminoheptanedioate (L,L-DAP) to meso-                                                           |
| gene886 (KP1_RS04420)  | -2. 51510776  | This protein may be involved in anomalous                                                                                                 |
| gene4336 (KP1_RS21615) | -2. 511947054 | Activator of cell division through the inhibition of FtsZ GTPase activity, therefore                                                      |
| gene3835 (KP1_RS19070) | -2. 510301493 | Part of the outer membrane protein assembly                                                                                               |
| gene3841 (KP1_RS19100) | -2. 509342681 | Major role in the synthesis of nucleoside triphosphates other than ATP. The ATP gamma                                                     |
| gene4108 (KP1_RS20450) | -2. 508453253 | Essential cell division protein. May link together the upstream cell division proteins,                                                   |
| gene3127 (KP1_RS15595) | -2. 505841603 | Cation transport protein                                                                                                                  |
| gene2626 (KP1_RS13080) | -2. 505467977 | Cell envelope integrity inner membrane protein                                                                                            |
| gene3613 (KP1_RS17940) | -2. 504649803 | UPF0352 protein                                                                                                                           |
| gene3853 (KP1_RS19160) | -2. 504015773 | scaffold protein                                                                                                                          |
| gene697 (KP1_RS03495)  | -2. 500162235 | dehydrogenase                                                                                                                             |
| gene5396 (KP1_RS26850) | -2. 496628193 | Phenylalanyl-tRNA synthetase beta subunit                                                                                                 |
| gene983 (KP1_RS04925)  | -2. 496261808 | Membrane-associated zinc metalloprotease                                                                                                  |
| gene1513 (KP1_RS07570) | -2. 495758006 | UPF0250 protein                                                                                                                           |

|                        |              |                                                                                                                                        |
|------------------------|--------------|----------------------------------------------------------------------------------------------------------------------------------------|
| gene871 (KP1_RS04350)  | -2.495445104 | DNA-binding transcriptional regulator FruR                                                                                             |
| gene3885 (KP1_RS19320) | -2.492943657 | Digests double-stranded RNA. Involved in the processing of primary rRNA transcript to yield                                            |
| gene168 (KP1_RS00810)  | -2.49210716  | Uroporphyrinogen-III synthase                                                                                                          |
| gene4756 (KP1_RS23715) | -2.491297909 | 3-dehydroquinate synthase                                                                                                              |
| gene3226 (KP1_RS16100) | -2.490367438 | L-serine dehydratase                                                                                                                   |
| gene1532 (KP1_RS07665) | -2.490277646 | (ABC) transporter                                                                                                                      |
| gene418 (KP1_RS02085)  | -2.487274894 | Multidrug resistance protein                                                                                                           |
| gene448 (KP1_RS02240)  | -2.481868717 | Nitric oxide-sensitive repressor of genes                                                                                              |
| gene449 (KP1_RS02245)  | -2.480707966 | 3'-5' exoribonuclease that releases 5'-                                                                                                |
| gene1821 (KP1_RS09090) | -2.480578938 | Aromatic amino acid aminotransferase                                                                                                   |
| gene4961 (KP1_RS24715) | -2.478860257 | One of the proteins required for the normal export of preproteins out of the cell cytoplasm.                                           |
| gene4551 (KP1_RS22710) | -2.475262892 | lipid carrier protein                                                                                                                  |
| gene5183 (KP1_RS25910) | -2.472862469 | phosphoadenosine phosphosulfate reductase                                                                                              |
| gene4885 (KP1_RS24360) | -2.471055474 | cytoplasmic protein                                                                                                                    |
| gene3934 (KP1_RS19580) | -2.470791108 | UPF0125 protein                                                                                                                        |
| gene4661 (KP1_RS23250) | -2.470039882 | Catalyzes the synthesis of dihydrouridine, a                                                                                           |
| gene1795 (pf1A)        | -2.468616504 | Pyruvate formate lyase-activating enzyme 1                                                                                             |
| gene4901 (KP1_RS24440) | -2.468615234 | Extracellular solute-binding protein, family 5                                                                                         |
| gene3768 (KP1_RS18735) | -2.464604963 | dyp-type peroxidase family protein                                                                                                     |
| gene3295 (KP1_RS16430) | -2.463812685 | Universal stress protein                                                                                                               |
| gene1501 (KP1_RS07510) | -2.458527267 | Universal stress protein                                                                                                               |
| gene3809 (KP1_RS18935) | -2.458125606 | Thioredoxin-dependent thiol peroxidase                                                                                                 |
| gene3789 (KP1_RS18840) | -2.456046826 | ethanolamine utilization protein                                                                                                       |
| gene2431 (KP1_RS12110) | -2.455174014 | LysR family transcriptional regulator                                                                                                  |
| gene4954 (KP1_RS24680) | -2.448691274 | Protein of unknown function (DUF2810)                                                                                                  |
| gene1837 (KP1_RS09175) | -2.446011093 | Contributes to the efficiency of the cell division process by stabilizing the polymeric                                                |
| gene480 (KP1_RS02400)  | -2.445704075 | Protein of unknown function (DUF1107)                                                                                                  |
| gene5146 (KP1_RS25650) | -2.443548649 | Catalyzes the first step in hexosamine                                                                                                 |
| gene1602 (KP1_RS08005) | -2.443192471 | Involved in the TonB-independent uptake of                                                                                             |
| gene4578 (KP1_RS22850) | -2.442091018 | Necessary for efficient RNA polymerase transcription elongation past template-encoded arresting sites. The arresting sites in DNA have |
| gene5326 (KP1_RS26545) | -2.440338822 | Replication protein                                                                                                                    |
| gene905 (KP1_RS04525)  | -2.440208895 | Transcriptional regulator                                                                                                              |
| gene3490 (KP1_RS17330) | -2.439647037 | tyrosine-protein kinase                                                                                                                |
| gene4599 (KP1_RS22955) | -2.439588051 | Sigma factors are initiation factors that                                                                                              |
| gene834 (KP1_RS04160)  | -2.437520683 | Chaperone involved in the correct folding and assembly of outer membrane proteins. Recognizes                                          |
| gene309 (KP1_RS01510)  | -2.437010013 | UPF0047 protein yjbQ                                                                                                                   |
| gene4516 (KP1_RS22520) | -2.436981739 | membrane                                                                                                                               |
| gene3213 (KP1_RS16030) | -2.436848142 | YcgL domain-containing protein                                                                                                         |
| gene3911 (KP1_RS19460) | -2.43628019  | Part of the outer membrane protein assembly                                                                                            |
| gene4017 (KP1_RS20000) | -2.436206762 | phosphatase                                                                                                                            |
| gene885 (KP1_RS04415)  | -2.434676384 | Essential cell division protein. May link together the upstream cell division proteins,                                                |
| gene2180 (KP1_RS10870) | -2.434606594 | inner membrane protein yciS                                                                                                            |
| gene914 (KP1_RS04570)  | -2.431681069 | UPF0231 protein                                                                                                                        |
| gene935 (KP1_RS04680)  | -2.429501308 | Sugar fermentation stimulation protein homolog                                                                                         |
| gene3659 (KP1_RS18165) | -2.428740856 | subunit 1                                                                                                                              |
| gene1955 (KP1_RS09740) | -2.426824802 | UPF0502 protein                                                                                                                        |
| gene80 (KP1_RS00380)   | -2.425034152 | Transcriptional regulator                                                                                                              |

|                        |              |                                                 |
|------------------------|--------------|-------------------------------------------------|
| gene4596 (KP1_RS22940) | -2.424463398 | Required for the translocation of               |
| gene3855 (KP1_RS19170) | -2.423527668 | Regulates the transcription of several operons  |
| gene4601 (KP1_RS22965) | -2.422886248 | PTS IIA-like nitrogen-regulatory protein PtsN   |
| gene4674 (KP1_RS23315) | -2.419174153 | shikimate dehydrogenase                         |
| gene2490 (KP1_RS12415) | -2.413281419 | multiple drug resistance protein MarC           |
| gene3665 (KP1_RS18195) | -2.410001066 | NADH dehydrogenase I, subunit F                 |
| gene1241 (KP1_RS06230) | -2.401783401 | hemolysin expression-modulating protein         |
| gene3282 (KP1_RS16365) | -2.400886195 | transcriptional regulatory protein              |
| gene3935 (KP1_RS19585) | -2.400540591 | Cyclase dehydrase                               |
| gene3752 (KP1_RS18640) | -2.400008281 | receptor for the septal ring structure, may     |
| gene4229 (KP1_RS21075) | -2.399048615 | Bacterial protein of unknown function (DUF903)  |
| gene1167 (nusB)        | -2.398736931 | Involved in the transcription termination       |
| gene3856 (KP1_RS19175) | -2.393362772 | RNA methyltransferase, TrmH family, group 1     |
| gene172 (KP1_RS00835)  | -2.392847427 | (Lipo)protein                                   |
| gene2162 (KP1_RS10785) | -2.391732363 | SUA5 YciO YrdC YwlC family protein              |
| gene1128 (KP1_RS05650) | -2.390636214 | pyrroline-5-carboxylate reductase               |
| gene5196 (KP1_RS25970) | -2.39002841  | Protein of unknown function (DUF1173)           |
| gene814 (KP1_RS04060)  | -2.389163808 | This protein specifically catalyzes the removal |
| gene875 (KP1_RS04365)  | -2.383748544 | Essential cell division protein. May link       |
| gene1965 (KP1_RS09790) | -2.382381258 | together the upstream cell division proteins,   |
| gene4335 (KP1_RS21610) | -2.381539444 | Catalyzes the reversible formation of acyl-     |
| gene1846 (KP1_RS09215) | -2.380126931 | phosphate (acyl-PO(4)) from acyl- acyl-carrier- |
| gene4430 (KP1_RS22085) | -2.374031527 | UPF0149 protein                                 |
| gene5148 (atpC)        | -2.372712996 | Necessary for the introduction of cis           |
| gene2478 (KP1_RS12350) | -2.37268815  | unsaturation into fatty acids. Catalyzes the    |
| gene1938 (mdoG)        | -2.372471497 | glutathionylspermidine synthase                 |
| gene3244 (KP1_RS16180) | -2.37092848  | Produces ATP from ADP in the presence of a      |
| gene14 (KP1_RS00070)   | -2.370392872 | methionine synthase                             |
| gene4635 (KP1_RS23135) | -2.370303903 | Involved in the biosynthesis of osmoregulated   |
| gene3134 (KP1_RS15630) | -2.368349549 | transcriptional regulator                       |
| gene876 (KP1_RS04370)  | -2.366799865 | transcriptional regulator                       |
| gene3734 (KP1_RS18555) | -2.363847712 | Protein of unknown function (DUF1471)           |
| gene883 (KP1_RS04405)  | -2.36272378  | Peptide chain release factor 1 directs the      |
| gene4334 (KP1_RS21605) | -2.362580913 | peptidoglycan synthetase ftsI                   |
| gene1153 (KP1_RS05780) | -2.362008687 | conserved protein                               |
| gene4770 (KP1_RS23780) | -2.361292333 | Cell wall formation (By similarity)             |
| gene1988 (KP1_RS09910) | -2.360534353 | aminopeptidase p                                |
| gene621 (KP1_RS03115)  | -2.358077447 | alkyl hydroperoxide reductase                   |
| gene486 (KP1_RS02430)  | -2.35504131  | phosphoenolpyruvate carboxylase                 |
| gene5246 (KP1_RS26200) | -2.354563577 | Reduces the permeability of the outer membrane  |
| gene1433 (KP1_RS07180) | -2.353305072 | to copper. Seems to be involved in the          |
| gene3228 (KP1_RS16115) | -2.352378172 | cytosine-specific methyltransferase             |
| gene835 (KP1_RS04165)  | -2.348500673 | aig2 family                                     |
| gene5248 (KP1_RS26210) | -2.346673867 | Uncharacterized protein conserved in bacteria   |
| gene1597 (KP1_RS07980) | -2.344840524 | inhibitor of vertebrate lysozyme                |
| gene996 (KP1_RS04990)  | -2.344650884 | membrane protein TerC                           |
| gene2307 (KP1_RS11490) | -2.34372594  | involved in the assembly of LPS in the outer    |
| gene5193 (KP1_RS25950) | -2.342154511 | leaflet of the outer membrane. Determines N-    |
| gene3142 (KP1_RS15665) | -2.341136958 | Transposase                                     |
|                        |              | cyd operon protein YbgE                         |
|                        |              | rho-binding antiterminator                      |
|                        |              | cytoplasmic protein                             |
|                        |              | Protein of unknown function (DUF2384)           |
|                        |              | transcription activated by CRP (cyclic AMP      |

|                        |              |                                                                                                |
|------------------------|--------------|------------------------------------------------------------------------------------------------|
| gene1510 (KP1_RS07555) | -2.337383365 | Catalyzes the radical-mediated insertion of two sulfur atoms into the C-6 and C-8 positions of |
| gene1047 (frsA)        | -2.336642669 | Fermentation respiration switch protein                                                        |
| gene4683 (KP1_RS23360) | -2.334029916 | Channel that opens in response to stretch forces                                               |
| gene1157 (KP1_RS05805) | -2.333366063 | Preprotein translocase, subunit YajC                                                           |
| gene1699 (KP1_RS08485) | -2.33153705  | glutamine ABC transporter periplasmic protein                                                  |
| gene919 (KP1_RS04595)  | -2.331294579 | uncharacterized protein yacC                                                                   |
| gene3996 (KP1_RS19885) | -2.330829698 | Protein of unknown function (DUF2002)                                                          |
| gene2867 (KP1_RS14280) | -2.327599855 | Destroys radicals which are normally produced                                                  |
| gene3290 (KP1_RS16405) | -2.325445758 | Involved in copper homeostasis (By similarity)                                                 |
| gene3806 (KP1_RS18920) | -2.325412868 | Part of the outer membrane protein assembly                                                    |
| gene4428 (KP1_RS22075) | -2.324715012 | Outer membrane protein tolC                                                                    |
| gene3664 (KP1_RS18190) | -2.32449937  | NADH dehydrogenase subunit G                                                                   |
| gene1302 (KP1_RS06535) | -2.322847637 | PPIases accelerate the folding of proteins (By                                                 |
| gene5128 (KP1_RS25555) | -2.320191794 | Required for the insertion and or proper folding                                               |
| gene4641 (KP1_RS23165) | -2.317850245 | and or complex formation of integral membrane                                                  |
| gene101 (glpA)         | -2.31642885  | peptidase U62, modulator of DNA gyrase                                                         |
| gene5147 (KP1_RS25655) | -2.316356618 | glycerol dehydrogenase                                                                         |
| gene2090 (KP1_RS10415) | -2.315603326 | Catalyzes the last two sequential reactions in                                                 |
| gene992 (KP1_RS04970)  | -2.314259097 | the de novo biosynthetic pathway for UDP-N-                                                    |
| gene4794 (KP1_RS23895) | -2.313931464 | acetylglucosamine (UDP- GlcNAc). The C-terminal                                                |
| gene3488 (KP1_RS17325) | -2.313703585 | MltA-interacting protein                                                                       |
| gene3640 (KP1_RS18065) | -2.307188121 | Component of the acetyl coenzyme A carboxylase                                                 |
| gene3832 (KP1_RS19055) | -2.307066593 | (ACC) complex. First, biotin carboxylase                                                       |
| gene169 (KP1_RS00815)  | -2.306398743 | pullulanase                                                                                    |
| gene3049 (KP1_RS15205) | -2.306325976 | Polysaccharide pyruvyl transferase                                                             |
| gene3830 (KP1_RS19045) | -2.304443974 | dehydrogenase subunit C                                                                        |
| gene3318 (KP1_RS16540) | -2.300721232 | cellular component movement                                                                    |
| gene4422 (KP1_RS22045) | -2.294141756 | Tetrapolymerization of the monopyrrole PBG into                                                |
| gene1977 (KP1_RS09850) | -2.292703424 | Transglycosylase-associated protein                                                            |
| gene3908 (KP1_RS19445) | -2.289619746 | Catalyzes the conversion of inosine 5'-phosphate                                               |
| gene3481 (KP1_RS17295) | -2.289617278 | (IMP) to xanthosine 5'-phosphate (XMP), the                                                    |
| gene4577 (KP1_RS22845) | -2.28515135  | The UvrABC repair system catalyzes the                                                         |
| gene3788 (KP1_RS18835) | -2.283634905 | recognition and processing of DNA lesions. UvrC                                                |
| gene2165 (KP1_RS10800) | -2.281512017 | Antibiotic biosynthesis monooxygenase                                                          |
| gene1525 (KP1_RS07625) | -2.281291113 | Histidine triad (HIT) protein                                                                  |
| gene1616 (KP1_RS08075) | -2.281029903 | Part of a stress-induced multi-chaperone system,                                               |
| gene3467 (KP1_RS17220) | -2.278631854 | it is involved in the recovery of the cell from                                                |
| gene1166 (KP1_RS05850) | -2.277879563 | Glycosyl Transferase                                                                           |
| gene1031 (KP1_RS05160) | -2.276504816 | RNA-binding protein                                                                            |
| gene3740 (KP1_RS18585) | -2.275509229 | Ethanolamine utilization protein eutQ                                                          |
| gene972 (KP1_RS04875)  | -2.275134811 | Pseudouridine synthase                                                                         |
| gene4940 (KP1_RS24625) | -2.275039124 | Leucyl-tRNA synthetase                                                                         |
| gene2356 (KP1_RS11735) | -2.274239589 | homeobox protein                                                                               |
| gene3100 (KP1_RS15470) | -2.273595943 | Glycosyl transferase                                                                           |
| gene2170 (KP1_RS10825) | -2.272684233 | Catalyzes the formation of 6,7-dimethyl-8-                                                     |
|                        |              | ribityllumazine by condensation of 5-amino-6-(D-                                               |
|                        |              | Catalyzes the isomerization of sedoheptulose 7-                                                |
|                        |              | regulator                                                                                      |
|                        |              | Tetrahydrodipicolinate N-succinyltransferase                                                   |
|                        |              | BAX protein                                                                                    |
|                        |              | YqaE family transport protein                                                                  |
|                        |              | K07001 NTE family protein                                                                      |
|                        |              | Protein of unknown function (DUF2498)                                                          |

|                        |              |                                                                                                                                            |
|------------------------|--------------|--------------------------------------------------------------------------------------------------------------------------------------------|
| gene953 (KP1_RS04775)  | -2.266987074 | Transposase                                                                                                                                |
| gene4374 (KP1_RS21810) | -2.265843132 | Protein with unknown function (DUF469)                                                                                                     |
| gene3471 (KP1_RS17240) | -2.262648135 | Glycosyl transferase family protein                                                                                                        |
| gene2123 (KP1_RS10585) | -2.260859824 | Periplasmic protein                                                                                                                        |
| gene800 (KP1_RS03995)  | -2.260791758 | molybdenum cofactor biosynthesis protein                                                                                                   |
| gene1505 (KP1_RS07530) | -2.257440909 | PagP is required both for biosynthesis of hepta-acylated lipid A species containing palmitate and for resistance to cationic antimicrobial |
| gene1820 (KP1_RS09085) | -2.256263619 | beta-lactamase domain protein                                                                                                              |
| gene417 (KP1_RS02080)  | -2.255847682 | entericidin B                                                                                                                              |
| gene1467 (KP1_RS07340) | -2.25564646  | Plasmid stabilisation system protein                                                                                                       |
| gene4014 (KP1_RS19985) | -2.255520695 | Involved in the synthesis of autoinducer 2 (AI-2) which is secreted by bacteria and is used to communicate both the cell density and the   |
| gene4795 (KP1_RS23900) | -2.253823073 | Catalyzes the formation of the alpha-1,6-glucosidic linkages in glycogen by scission of a                                                  |
| gene2178 (KP1_RS10860) | -2.252454954 | Catalyzes the conversion of GTP to 2,5-diamino-                                                                                            |
| gene1604 (KP1_RS08015) | -2.248437522 | tol-pal system protein YbgF                                                                                                                |
| gene444 (KP1_RS02215)  | -2.245951312 | hflC protein                                                                                                                               |
| gene3325 (KP1_RS16575) | -2.245187997 | Cystine transporter subunit                                                                                                                |
| gene1170 (KP1_RS05870) | -2.244070548 | aldo keto reductase                                                                                                                        |
| gene3128 (chaB)        | -2.240096057 | Cation transport regulator                                                                                                                 |
| gene1303 (KP1_RS06540) | -2.239511385 | cysteinyl-tRNA synthetase                                                                                                                  |
| gene5181 (KP1_RS28360) | -2.237472351 | Transposase                                                                                                                                |
| gene741 (KP1_RS03710)  | -2.235407429 | dna replication protein                                                                                                                    |
| gene3898 (KP1_RS19390) | -2.233834584 | Thioredoxin 2                                                                                                                              |
| gene1677 (KP1_RS08370) | -2.232644905 | inner membrane protein ybhQ                                                                                                                |
| gene4789 (KP1_RS23870) | -2.225475315 | Catalyzes, although with low efficiency, the                                                                                               |
| gene1784 (KP1_RS27540) | -2.225045773 | Transcriptional regulator                                                                                                                  |
| gene3944 (KP1_RS19625) | -2.224754508 | Transcriptional regulator                                                                                                                  |
| gene4026 (KP1_RS20045) | -2.224441894 | Catalyzes the attachment of alanine to tRNA(Ala) in a two-step reaction alanine is first                                                   |
| gene1008 (KP1_RS05050) | -2.222052026 | d,d-heptose 1,7-bisphosphate phosphatase                                                                                                   |
| gene154 (KP1_RS00735)  | -2.219230084 | Catalyzes the formation of dTDP-glucose, from                                                                                              |
| gene3455 (KP1_RS17160) | -2.217718565 | Nad-dependent epimerase dehydratase                                                                                                        |
| gene1978 (KP1_RS09855) | -2.216593359 | (Lipo)protein                                                                                                                              |
| gene4962 (KP1_RS24720) | -2.211918009 | glutaredoxin 3                                                                                                                             |
| gene4292 (KP1_RS21395) | -2.210330602 | Uncharacterized protein yoac                                                                                                               |
| gene1857 (KP1_RS09270) | -2.210018203 | domain protein                                                                                                                             |
| gene3790 (KP1_RS18845) | -2.209706097 | May be involved in the formation of a specific                                                                                             |
| gene4093 (KP1_RS20375) | -2.207035356 | Hok Gef family protein                                                                                                                     |
| gene2023 (KP1_RS10090) | -2.206661124 | Catalyzes the 2-thiolation of uridine at the                                                                                               |
| gene5381 (KP1_RS26795) | -2.204694504 | Predicted nucleotide-binding protein containing                                                                                            |
| gene2542 (KP1_RS12660) | -2.203232117 | Lipoprotein                                                                                                                                |
| gene3137 (KP1_RS15645) | -2.20305635  | Catalyzes the phosphorylation of the position 2 Part of the Sec protein translocase complex.                                               |
| gene890 (KP1_RS04440)  | -2.198219684 | Interacts with the SecYEG preprotein conducting channel. Has a central role in coupling the                                                |
| gene3550 (KP1_RS17635) | -2.196497365 | UPF0387 membrane protein YohO                                                                                                              |
| gene1952 (KP1_RS09725) | -2.194532294 | Lipoprotein                                                                                                                                |
| gene523 (KP1_RS02635)  | -2.19385074  | endoribonuclease L-PSP                                                                                                                     |
| gene4953 (KP1_RS24675) | -2.191468155 | LF82 chromosome, complete sequence                                                                                                         |
| gene1466 (KP1_RS07335) | -2.190282021 | Xre family transcriptional regulator                                                                                                       |
| gene1202 (KP1_RS06030) | -2.188994608 | Peptidyl-prolyl cis-trans isomerase                                                                                                        |

|                        |              |                                                   |
|------------------------|--------------|---------------------------------------------------|
| gene4405 (KP1_RS21960) | -2.182330677 | Biopolymer transport protein exbB                 |
| gene5348 (KP1_RS26640) | -2.181360791 | von willebrand factor, type a                     |
| gene153 (KP1_RS00730)  | -2.180612644 | dtdp-glucose 4,6-dehydratase                      |
| gene479 (KP1_RS02395)  | -2.177582865 | transcriptional regulator                         |
| gene1811 (KP1_RS09045) | -2.177236445 | transferase activity, transferring phosphorus-    |
| gene195 (KP1_RS00955)  | -2.176733413 | sterol-binding domain protein                     |
| gene1630 (KP1_RS08150) | -2.176159508 | Catalyzes the hydrolysis of 6-                    |
| gene3096 (KP1_RS15445) | -2.175203744 | thymidine kinase                                  |
| gene4132 (KP1_RS20575) | -2.175038122 | Flavodoxin                                        |
| gene3321 (KP1_RS16555) | -2.174879352 | transcriptional regulator                         |
| gene5123 (dnaA)        | -2.174710416 | it binds specifically double-stranded DNA at a 9  |
| gene3742 (KP1_RS18595) | -2.173505383 | Catalyzes the attachment of glutamate to          |
| gene1267 (KP1_RS06370) | -2.172580646 | tRNA(Glu) in a two-step reaction glutamate is     |
| gene4343 (KP1_RS21650) | -2.170983225 | SPFH domain, Band 7 family protein                |
| gene1673 (KP1_RS08350) | -2.170005898 | Involved in the export of arginine. Important to  |
| gene1797 (KP1_RS08975) | -2.168010744 | membrane                                          |
| gene4352 (KP1_RS21700) | -2.16783357  | transporter                                       |
| gene3559 (KP1_RS17680) | -2.166565164 | Catalyzes the biosynthesis of agmatine from       |
| gene404 (KP1_RS02015)  | -2.165844147 | inner membrane protein yohC                       |
| gene4226 (KP1_RS21055) | -2.165775799 | (Lip0)protein                                     |
| gene4314 (KP1_RS21505) | -2.163512091 | Accelerates the degradation of transcripts by     |
| gene3634 (KP1_RS18040) | -2.162008781 | removing pyrophosphate from the 5'-end of         |
| gene3095 (KP1_RS15440) | -2.160125187 | Thiol disulfide interchange protein (DsbC)        |
| gene196 (ubiB)         | -2.159402085 | Ferredoxin                                        |
| gene1173 (KP1_RS05885) | -2.159041216 | alcohol dehydrogenase                             |
| gene3676 (KP1_RS18250) | -2.159023231 | Required, probably indirectly, for the            |
| gene3997 (KP1_RS19890) | -2.15844789  | Bidirectionally degrades single-stranded DNA      |
| gene1133 (KP1_RS05675) | -2.158393431 | UPF0304 protein                                   |
| gene1997 (KP1_RS09960) | -2.15627408  | uncharacterized protein ygaM                      |
| gene2726 (KP1_RS13575) | -2.155563123 | Protein of aro operon, regulated by aroR          |
| gene3793 (KP1_RS18860) | -2.155163865 | transcriptional regulator                         |
| gene87 (KP1_RS00415)   | -2.155039916 | 30S ribosomal subunit S22                         |
| gene237 (KP1_RS01150)  | -2.154639762 | transketolase (EC 2.2.1.1)                        |
| gene884 (ddl)          | -2.151544106 | Protease subunit of a proteasome-like             |
| gene1647 (KP1_RS08240) | -2.151168927 | PTS system lactose cellobiose-specific            |
| gene4456 (KP1_RS22225) | -2.145856498 | Cell wall formation (By similarity)               |
| gene4161 (KP1_RS20725) | -2.144714581 | histidine utilization repressor                   |
| gene4318 (KP1_RS21525) | -2.144387178 | Sigma factors are initiation factors that         |
| gene1691 (KP1_RS08445) | -2.141042401 | transcriptional                                   |
| gene3716 (KP1_RS18460) | -2.140740117 | TPR repeat protein                                |
| gene5105 (KP1_RS25450) | -2.138791078 | UPF0379 protein ybiJ                              |
| gene1564 (KP1_RS07820) | -2.13735363  | UPF0381 protein                                   |
| gene83 (KP1_RS00395)   | -2.135145795 | transport protein                                 |
| gene998 (KP1_RS05000)  | -2.134734694 | phosphoglucomutase EC 5.4.2.2                     |
| gene922 (KP1_RS04615)  | -2.132889355 | ec 2.7.1.11                                       |
| gene3231 (KP1_RS16130) | -2.128714236 | YaeQ family                                       |
| gene4857 (KP1_RS24215) | -2.128394835 | Hypoxanthine phosphoribosyltransferase            |
| gene4999 (KP1_RS24905) | -2.127916656 | PTS system mannose-specific transporter subunit   |
| gene4124 (KP1_RS20540) | -2.127371529 | phosphate transporter                             |
| gene1056 (KP1_RS05280) | -2.125712544 | YicC domain protein                               |
| gene1979 (KP1_RS09860) | -2.12278482  | In eubacteria ppGpp (guanosine 3'-diphosphate 5'- |
|                        |              | ' diphosphate) is a mediator of the stringent     |
|                        |              | UPF0386 protein                                   |
|                        |              | Regulator of peptidoglycan synthesis that is      |

|                        |              |                                                                                                                                                                                                                                    |
|------------------------|--------------|------------------------------------------------------------------------------------------------------------------------------------------------------------------------------------------------------------------------------------|
| gene2189 (KP1_RS10925) | -2.122246067 | Enoyl- acyl-carrier-protein reductase NADH                                                                                                                                                                                         |
| gene1941 (KP1_RS09675) | -2.121227142 | Acidic protein msyB                                                                                                                                                                                                                |
| gene2379 (KP1_RS11845) | -2.116888532 | Exported protein                                                                                                                                                                                                                   |
| gene439 (KP1_RS02190)  | -2.111849338 | This protein is involved in the repair of mismatches in DNA. It is required for dam-                                                                                                                                               |
| gene2181 (KP1_RS10875) | -2.110748446 | Tetratricopeptide repeat protein                                                                                                                                                                                                   |
| gene1804 (KP1_RS09010) | -2.110043556 | This protein is one of the two subunits of integration host factor, a specific DNA-binding                                                                                                                                         |
| gene881 (KP1_RS04395)  | -2.107349537 | Essential cell division protein. Transports                                                                                                                                                                                        |
| gene4600 (KP1_RS22960) | -2.105481734 | modulation protein                                                                                                                                                                                                                 |
| gene2205 (KP1_RS11005) | -2.105257547 | phage shock protein C                                                                                                                                                                                                              |
| gene1243 (KP1_RS06240) | -2.103374805 | Resistance protein                                                                                                                                                                                                                 |
| gene5171 (KP1_RS25865) | -2.09474784  | sam-dependent methyltransferase                                                                                                                                                                                                    |
| gene1809 (KP1_RS09035) | -2.094230593 | UPF0434 protein                                                                                                                                                                                                                    |
| gene278 (KP1_RS01350)  | -2.091318799 | Phosphohexose isomerase                                                                                                                                                                                                            |
| gene3215 (KP1_RS16045) | -2.085644191 | site-determining protein                                                                                                                                                                                                           |
| gene1817 (KP1_RS09075) | -2.082403466 | ErfK YbiS YcfS YnhG family protein                                                                                                                                                                                                 |
| gene3808 (KP1_RS18930) | -2.081808184 | Glycine cleavage system transcriptional                                                                                                                                                                                            |
| gene1561 (KP1_RS07800) | -2.0815868   | LexA regulated protein                                                                                                                                                                                                             |
| gene3792 (KP1_RS18855) | -2.078957242 | Transaldolase is important for the balance of                                                                                                                                                                                      |
| gene248 (KP1_RS01205)  | -2.070993946 | Catalyzes the decarboxylation of four acetate                                                                                                                                                                                      |
| gene3663 (KP1_RS18185) | -2.070957952 | NDH-1 shuttles electrons from NADH, via FMN and iron- sulfur (Fe-S) centers, to quinones in the respiratory chain. The immediate electron                                                                                          |
| gene4858 (KP1_RS24220) | -2.069592361 | universal stress protein B                                                                                                                                                                                                         |
| gene785 (KP1_RS03925)  | -2.067273759 | Catabolite regulation protein A                                                                                                                                                                                                    |
| gene1244 (KP1_RS06245) | -2.06558227  | RND Family Efflux Transporter MFP Subunit                                                                                                                                                                                          |
| gene813 (KP1_RS04055)  | -2.065467537 | amino acids such as valine, to avoid such errors it has two additional distinct tRNA(Ile)-                                                                                                                                         |
| gene4865 (KP1_RS24255) | -2.064800675 | Glutathione reductase                                                                                                                                                                                                              |
| gene2173 (KP1_RS10835) | -2.063655022 | Releases the supercoiling and torsional tension of DNA, which is introduced during the DNA replication and transcription, by transiently cleaving and rejoining one strand of the DNA duplex. Introduces a single-strand break via |
| gene4828 (KP1_RS24070) | -2.059610687 | Involved in targeting and insertion of nascent membrane proteins into the cytoplasmic membrane. Acts as a receptor for the complex formed by the                                                                                   |
| gene4787 (KP1_RS23860) | -2.059515721 | Glycerol-3-phosphate regulon repressor                                                                                                                                                                                             |
| gene4662 (fis)         | -2.058792261 | Activates ribosomal RNA transcription. Plays a                                                                                                                                                                                     |
| gene3545 (KP1_RS17610) | -2.057177575 | Atp-binding protein                                                                                                                                                                                                                |
| gene3078 (KP1_RS15345) | -2.056431583 | 6-phosphofructokinase                                                                                                                                                                                                              |
| gene1823 (KP1_RS09100) | -2.055887908 | asparaginyl-tRNA synthetase                                                                                                                                                                                                        |
| gene4398 (KP1_RS21925) | -2.055755752 | Glutathione S-transferase                                                                                                                                                                                                          |
| gene3031 (KP1_RS15110) | -2.055725598 | Is able to transfer iron-sulfur clusters to apo-ferredoxin. Multiple cycles of 2Fe2S cluster formation and transfer are observed, suggesting                                                                                       |
| gene4344 (KP1_RS21660) | -2.055612672 | Mechanosensitive ion channel                                                                                                                                                                                                       |
| gene4423 (KP1_RS22050) | -2.054156488 | DNA topoisomerase IV, subunit B                                                                                                                                                                                                    |
| gene1645 (KP1_RS08230) | -2.053562878 | imidazolone-5-propionate hydrolase                                                                                                                                                                                                 |
| gene3281 (KP1_RS16360) | -2.051983077 | Nuclease that resolves Holliday junction intermediates in genetic recombination. Cleaves                                                                                                                                           |
| gene3718 (KP1_RS18470) | -2.051794326 | (Lip0)protein                                                                                                                                                                                                                      |
| gene2710 (KP1_RS13500) | -2.050628273 | Osmotically inducible protein                                                                                                                                                                                                      |



|                        |              |                                                                                                                                                                                                                                                                                            |
|------------------------|--------------|--------------------------------------------------------------------------------------------------------------------------------------------------------------------------------------------------------------------------------------------------------------------------------------------|
| gene5280 (KP1_RS26365) | -2.050621298 | Transposase                                                                                                                                                                                                                                                                                |
| gene3926 (KP1_RS19540) | -2.050096018 | Involved in targeting and insertion of nascent membrane proteins into the cytoplasmic membrane. Binds to the hydrophobic signal sequence of the ribosome-nascent chain (RNC) as it emerges from Part of the twin-arginine translocation (Tat) system that transports large folded proteins |
| gene197 (KP1_RS00965)  | -2.049159034 | UPF0253 protein                                                                                                                                                                                                                                                                            |
| gene997 (KP1_RS04995)  | -2.047606125 | Heat shock protein                                                                                                                                                                                                                                                                         |
| gene5108 (KP1_RS25465) | -2.042660019 | Ribbon-helix-helix protein, copG family                                                                                                                                                                                                                                                    |
| gene41 (KP1_RS00195)   | -2.040106293 | alkyl hydroperoxide reductase                                                                                                                                                                                                                                                              |
| gene1500 (KP1_RS07505) | -2.039800621 | Signal peptidase I                                                                                                                                                                                                                                                                         |
| gene3886 (KP1_RS19330) | -2.037871554 | lysyl-tRNA synthetase                                                                                                                                                                                                                                                                      |
| gene1329 (KP1_RS06665) | -2.03733553  | Catalyzes a trans-dehydration via an enolate response regulator                                                                                                                                                                                                                            |
| gene4653 (KP1_RS23220) | -2.036480766 | cytidine monophosphate kinase                                                                                                                                                                                                                                                              |
| gene3099 (KP1_RS15465) | -2.035782147 | nitrogen regulatory protein PII                                                                                                                                                                                                                                                            |
| gene1802 (KP1_RS09000) | -2.035255385 | Involved in chromosome condensation, segregation and cell cycle progression. May participate in facilitating chromosome segregation by                                                                                                                                                     |
| gene3871 (KP1_RS19245) | -2.033685477 | IIa component                                                                                                                                                                                                                                                                              |
| gene1814 (KP1_RS09060) | -2.033549824 | reductase                                                                                                                                                                                                                                                                                  |
| gene926 (KP1_RS04635)  | -2.032984094 | Phospho-2-dehydro-3-deoxyoctonate aldolase                                                                                                                                                                                                                                                 |
| gene4411 (KP1_RS21990) | -2.026006528 | Pfam:Tellurium_res                                                                                                                                                                                                                                                                         |
| gene3130 (KP1_RS15610) | -2.025945568 | Could be a mediator in iron transactions between ABC transporter                                                                                                                                                                                                                           |
| gene5349 (KP1_RS26645) | -2.025551956 | inner membrane protein Ytfl                                                                                                                                                                                                                                                                |
| gene4377 (KP1_RS21825) | -2.025079158 | abc transporter atp-binding protein                                                                                                                                                                                                                                                        |
| gene3472 (KP1_RS17245) | -2.022811611 | Glutathione peroxidase                                                                                                                                                                                                                                                                     |
| gene482 (KP1_RS02410)  | -2.022068076 | Catalyzes the formation of a hydroxyacyl-CoA by (ABC) transporter                                                                                                                                                                                                                          |
| gene4598 (KP1_RS22950) | -2.021690541 | Lipoprotein involved with copper homeostasis and dna binding protein                                                                                                                                                                                                                       |
| gene3061 (KP1_RS15265) | -2.021538136 | decarboxylase                                                                                                                                                                                                                                                                              |
| gene3714 (KP1_RS18450) | -2.021312602 | Dihydrolipoamide acetyltransferase                                                                                                                                                                                                                                                         |
| gene1757 (KP1_RS08785) | -2.020100144 | geranyltranstransferase                                                                                                                                                                                                                                                                    |
| gene1000 (KP1_RS05010) | -2.015369244 | cysteine desulfurase activator complex subunit subunit m                                                                                                                                                                                                                                   |
| gene3993 (KP1_RS19870) | -2.013434392 | Inner membrane protein YebE                                                                                                                                                                                                                                                                |
| gene3732 (KP1_RS18545) | -2.012420077 | Protein of unknown function (DUF1471)                                                                                                                                                                                                                                                      |
| gene907 (aceF)         | -2.009935051 | Type VI secretion                                                                                                                                                                                                                                                                          |
| gene1172 (KP1_RS05880) | -2.009417522 | cell wall organization                                                                                                                                                                                                                                                                     |
| gene3030 (KP1_RS15105) | -2.008598502 | transporter                                                                                                                                                                                                                                                                                |
| gene3658 (KP1_RS18160) | -2.008449885 | in Yersinia this gene is involved in biofilm                                                                                                                                                                                                                                               |
| gene3264 (KP1_RS16280) | -2.005033386 | Transcriptional regulator, LysR family                                                                                                                                                                                                                                                     |
| gene4778 (KP1_RS23820) | -2.003935534 | oxidase) subunit II                                                                                                                                                                                                                                                                        |
| gene2271 (KP1_RS11325) | 2.002603808  | protocatechuate 3,4-dioxygenase, alpha                                                                                                                                                                                                                                                     |
| gene1095 (KP1_RS05470) | 2.003569462  | F pilus assembly Type-IV secretion system for                                                                                                                                                                                                                                              |
| gene5067 (KP1_RS25265) | 2.004838839  | thiamine transporter membrane protein                                                                                                                                                                                                                                                      |
| gene385 (KP1_RS01905)  | 2.005715971  | hydrolase, family 31                                                                                                                                                                                                                                                                       |
| gene2920 (KP1_RS14550) | 2.006190418  | membrane                                                                                                                                                                                                                                                                                   |
| gene2808 (KP1_RS13995) | 2.006193657  | synthase                                                                                                                                                                                                                                                                                   |
| gene2829 (KP1_RS14095) | 2.006198445  | leucine isoleucine valine transporter, ATP-                                                                                                                                                                                                                                                |
| gene592 (KP1_RS02975)  | 2.006817723  | Conjugal transfer protein                                                                                                                                                                                                                                                                  |
| gene851 (thiP)         | 2.00697573   |                                                                                                                                                                                                                                                                                            |
| gene1712 (KP1_RS08555) | 2.008351221  |                                                                                                                                                                                                                                                                                            |
| gene5116 (KP1_RS25505) | 2.009693504  |                                                                                                                                                                                                                                                                                            |
| gene3366 (KP1_RS16785) | 2.011415643  |                                                                                                                                                                                                                                                                                            |
| gene1101 (livG)        | 2.01145458   |                                                                                                                                                                                                                                                                                            |
| gene3404 (KP1_RS16925) | 2.013649001  |                                                                                                                                                                                                                                                                                            |

|                        |             |                                                                                                                                             |
|------------------------|-------------|---------------------------------------------------------------------------------------------------------------------------------------------|
| gene141 (KP1_RS00680)  | 2.014180026 | amidohydrolase 2                                                                                                                            |
| gene5130 (KP1_RS25565) | 2.014474126 | Gcn5-related n-acetyltransferase                                                                                                            |
| gene241 (KP1_RS01170)  | 2.014810848 | Catalyzes the rearrangement of 1-deoxy-D-xylulose 5-phosphate (DXP) to produce the                                                          |
| gene3541 (KP1_RS17590) | 2.016234144 | Xanthine uracil vitamin C permease                                                                                                          |
| gene4389 (KP1_RS21875) | 2.017487364 | cysteine synthase                                                                                                                           |
| gene2633 (KP1_RS13115) | 2.018812339 | amino acid AbC transporter                                                                                                                  |
| gene5085 (KP1_RS25350) | 2.019770872 | sugar phosphate antiporter                                                                                                                  |
| gene3266 (KP1_RS16290) | 2.023371676 | Catalyzes two reactions the first one is the                                                                                                |
| gene2245 (KP1_RS11200) | 2.026072064 | Short-chain dehydrogenase reductase Sdr                                                                                                     |
| gene856 (KP1_RS04280)  | 2.02636702  | Sugar (and other) transporter                                                                                                               |
| gene845 (KP1_RS04215)  | 2.026610458 | L-ribulose-5-phosphate 4-epimerase                                                                                                          |
| gene1958 (KP1_RS09755) | 2.029063088 | Major Facilitator                                                                                                                           |
| gene4470 (pduC)        | 2.029109823 | Dehydratase large subunit                                                                                                                   |
| gene4930 (KP1_RS24580) | 2.030726874 | Inner membrane protein yiaH                                                                                                                 |
| gene587 (KP1_RS02950)  | 2.031125114 | PTS system                                                                                                                                  |
| gene4585 (KP1_RS22885) | 2.036077284 | Transcriptional regulator                                                                                                                   |
| gene5081 (nepI)        | 2.036355964 | Major Facilitator                                                                                                                           |
| gene3019 (KP1_RS15045) | 2.036448713 | 4-hydroxyphenylpyruvate dioxygenase                                                                                                         |
| gene1103 (KP1_RS05515) | 2.038993993 | branched-chain amino acid                                                                                                                   |
| gene4113 (KP1_RS20475) | 2.042572702 | Multifunctional enzyme that catalyzes the SAM-dependent methylation of uroporphyrinogen III at position C-2 and C-7 to form precorrin-2 and |
| gene5075 (KP1_RS25305) | 2.042777161 | Part of the ABC transporter complex PotABCD                                                                                                 |
| gene1346 (KP1_RS06760) | 2.045961845 | Protein of unknown function (DUF3302)                                                                                                       |
| gene3961 (KP1_RS19710) | 2.046395699 | Prolyl oligopeptidase family                                                                                                                |
| gene3960 (KP1_RS19705) | 2.047114155 | Glyoxalase/Bleomycin resistance                                                                                                             |
| gene505 (KP1_RS02540)  | 2.049519789 | dihydro-orotase (EC 3.5.2.3)                                                                                                                |
| gene3151 (KP1_RS15710) | 2.049560649 | type VI secretion protein                                                                                                                   |
| gene3036 (KP1_RS15140) | 2.050644307 | acriflavin resistance protein                                                                                                               |
| gene4153 (KP1_RS20680) | 2.051069911 | l-fucose phosphate aldolase                                                                                                                 |
| gene2285 (KP1_RS11395) | 2.051901014 | Aminotransferase class I and II                                                                                                             |
| gene4096 (KP1_RS20390) | 2.052000726 | 3-octaprenyl-4-hydroxybenzoate carboxy-lyase                                                                                                |
| gene3986 (KP1_RS19835) | 2.052624095 | Transcriptional regulator                                                                                                                   |
| gene2746 (KP1_RS13680) | 2.053267623 | formate dehydrogenase, alpha subunit                                                                                                        |
| gene5332 (KP1_RS26570) | 2.057883126 | nitrilase cyanide hydratase and apolipoprotein                                                                                              |
| gene3017 (KP1_RS15035) | 2.057983181 | shikimate dehydrogenase substrate binding                                                                                                   |
| gene4090 (KP1_RS20360) | 2.060145723 | Permease protein                                                                                                                            |
| gene1295 (KP1_RS06505) | 2.060723797 | carboxylase                                                                                                                                 |
| gene2939 (KP1_RS14655) | 2.061396908 | LysR family transcriptional regulator                                                                                                       |
| gene2975 (KP1_RS14820) | 2.061752661 | #NAME?                                                                                                                                      |
| gene2352 (KP1_RS11710) | 2.063994112 | transporter                                                                                                                                 |
| gene3174 (KP1_RS15830) | 2.066088548 | Major Facilitator Superfamily                                                                                                               |
| gene1376 (KP1_RS06910) | 2.068398957 | Oxidoreductase                                                                                                                              |
| gene586 (KP1_RS02945)  | 2.06910393  | PTS system glucitol sorbitol-specific IIA                                                                                                   |
| gene707 (KP1_RS03545)  | 2.069929231 | Major Facilitator                                                                                                                           |
| gene1478 (KP1_RS07395) | 2.070359249 | Inositol monophosphatase                                                                                                                    |
| gene2908 (KP1_RS14490) | 2.072997629 | transporter                                                                                                                                 |
| gene3170 (KP1_RS15810) | 2.075251889 | Pseudouridine synthase                                                                                                                      |
| gene4043 (KP1_RS20130) | 2.076011434 | uses NADH to detoxify nitric oxide (NO), protecting several 4Fe-4S NO-sensitive enzymes.                                                    |
| gene1398 (KP1_RS07015) | 2.0774168   | ATPase, P-type (transporting), HAD superfamily,                                                                                             |
| gene4302 (KP1_RS21445) | 2.078894943 | NAD(P)H dehydrogenase (quinone)                                                                                                             |
| gene695 (KP1_RS27300)  | 2.079863746 | AraC family transcriptional regulator                                                                                                       |

|                        |             |                                                  |
|------------------------|-------------|--------------------------------------------------|
| gene5063 (KP1_RS25245) | 2.081635834 | 4-carboxy-4-hydroxy-2-oxoadipate aldolase        |
| gene2003 (KP1_RS09990) | 2.0821687   | isomerase B                                      |
| gene4855 (KP1_RS24205) | 2.084996709 | transporter                                      |
| gene343 (KP1_RS01680)  | 2.085182004 | Fimbrial                                         |
| gene1443 (KP1_RS07230) | 2.085941813 | Glycerol kinase                                  |
| gene3365 (KP1_RS16780) | 2.086361475 | isochorismatase                                  |
| gene3942 (KP1_RS19615) | 2.090254122 | RND Family Efflux Transporter MFP Subunit        |
| gene3181 (KP1_RS15865) | 2.090572817 | (ABC) transporter                                |
| gene2753 (KP1_RS13715) | 2.090927359 | catechol 1,2-dioxygenase                         |
| gene5055 (KP1_RS25205) | 2.091559293 | RND efflux system, outer membrane lipoprotein    |
| gene4111 (KP1_RS20465) | 2.091816301 | may be the GTPase, regulating ATP sulfurylase    |
| gene1805 (KP1_RS09015) | 2.098030473 | DNA internalization-related competence protein   |
| gene2197 (KP1_RS10965) | 2.104521094 | NmrA-like family                                 |
| gene3519 (KP1_RS17485) | 2.104525631 | mandelate racemase muconate lactonizing          |
| gene1890 (KP1_RS09430) | 2.104854881 | Oxidoreductase                                   |
| gene2774 (KP1_RS13820) | 2.104930336 | Gcn5-related n-acetyltransferase                 |
| gene4145 (KP1_RS20635) | 2.105269277 | transport system                                 |
| gene5022 (KP1_RS25030) | 2.111045057 | permease                                         |
| gene3920 (KP1_RS19505) | 2.114919812 | Iron-regulated membrane protein                  |
| gene4445 (KP1_RS22175) | 2.115896494 | Urea amidohydrolase subunit gamma                |
| gene2940 (KP1_RS14660) | 2.1161613   | Alpha-acetolactate decarboxylase                 |
| gene4271 (KP1_RS21290) | 2.116889142 | EamA-like transporter family                     |
| gene2346 (KP1_RS11680) | 2.118643612 | Acetylornithine aminotransferase                 |
| gene1623 (KP1_RS08115) | 2.122810974 | ATP-binding protein                              |
| gene1832 (ssuC)        | 2.124254093 | transporter, permease                            |
| gene4207 (KP1_RS20955) | 2.125003287 | propanediol utilization protein                  |
| gene1484 (KP1_RS07425) | 2.125236064 | xylulokinase (EC 2.7.1.17)                       |
| gene2919 (KP1_RS14545) | 2.125714341 | ABC transporter Periplasmic                      |
| gene2706 (KP1_RS13480) | 2.126229539 | cation diffusion facilitator family transporter  |
| gene1111 (tauB)        | 2.127895739 | Part of the ABC transporter complex TauABC       |
| gene5076 (KP1_RS25310) | 2.128374491 | (ABC) transporter                                |
| gene5094 (KP1_RS25390) | 2.128741077 | membrane                                         |
| gene5334 (KP1_RS26580) | 2.12897336  | Gcn5-related n-acetyltransferase                 |
| gene1477 (KP1_RS07390) | 2.132012396 | Regulatory protein UhpC                          |
| gene607 (KP1_RS03050)  | 2.133331113 | Inherit from proNOG: pill protein                |
| gene1100 (KP1_RS05500) | 2.135185826 | (ABC) transporter                                |
| gene66 (KP1_RS00315)   | 2.136913698 | (ABC) transporter                                |
| gene2871 (KP1_RS14300) | 2.13828182  | Nadh flavin oxidoreductase nadh oxidase          |
| gene3609 (KP1_RS17920) | 2.139052593 | 6-aminohexanoate-dimer hydrolase                 |
| gene2349 (KP1_RS11695) | 2.139212435 | Catalyzes the hydrolysis of N(2)-                |
| gene292 (KP1_RS01415)  | 2.142583922 | maltose operon periplasmic protein               |
| gene475 (KP1_RS02375)  | 2.14276696  | NmrA Family                                      |
| gene3457 (KP1_RS17170) | 2.142976745 | Catalyzes the sequential NAD-dependent           |
| gene656 (KP1_RS03295)  | 2.145467871 | Efflux transporter, RND family, MFP subunit      |
| gene4091 (KP1_RS20365) | 2.148372201 | Part of the ABC transporter complex HmuTUV       |
| gene2404 (KP1_RS11970) | 2.148570104 | transporter                                      |
| gene4664 (KP1_RS23265) | 2.149728098 | RND Family Efflux Transporter MFP Subunit        |
| gene651 (KP1_RS03270)  | 2.150135317 | Transcriptional regulator                        |
| gene4938 (KP1_RS24615) | 2.15080586  | ABC transporter (Permease)                       |
| gene4419 (KP1_RS22030) | 2.152742767 | regulator                                        |
| gene3999 (KP1_RS19900) | 2.154499184 | Antioxidant protein with alkyl hydroperoxidase   |
| gene2819 (KP1_RS27830) | 2.156568406 | activity. Required for the reduction of the AhpC |
| gene598 (KP1_RS03005)  | 2.158657175 | tellurite resistance protein tehB                |
|                        |             | Protein of unknown function (DUF2976)            |

|                        |             |                                                  |
|------------------------|-------------|--------------------------------------------------|
| gene2955 (KP1_RS14730) | 2.159753341 | heme exporter protein                            |
| gene4853 (KP1_RS24195) | 2.1606754   | Transcriptional regulator                        |
| gene1348 (KP1_RS06770) | 2.162913748 | (ABC) transporter                                |
| gene4295 (KP1_RS21410) | 2.164264529 | Arsenical pump membrane protein                  |
| gene3182 (KP1_RS15870) | 2.164822338 | (ABC) transporter                                |
| gene2952 (KP1_RS14715) | 2.164879806 | Cytochrome c-type biogenesis protein ccmF        |
| gene3508 (KP1_RS17430) | 2.16492901  | Resistance protein                               |
| gene3164 (KP1_RS15785) | 2.166337375 | Type IV VI secretion system protein, DotU family |
| gene725 (KP1_RS03630)  | 2.167421297 | Symporter                                        |
| gene5086 (KP1_RS25355) | 2.167481267 | transporter                                      |
| gene2322 (KP1_RS11555) | 2.168903309 | Phenylacetate-CoA oxygenase, PaaG subunit        |
| gene4448 (KP1_RS22190) | 2.169856754 | Involved in urease metallocenter assembly. Binds |
| gene617 (KP1_RS03095)  | 2.170208922 | Inherit from proNOG: ParB-like nuclease domain   |
| gene4467 (KP1_RS22280) | 2.170389679 | diol glycerol dehydratase reactivating factor    |
| gene1403 (KP1_RS07040) | 2.173949282 | Extracellular solute-binding protein, family 5   |
| gene1414 (KP1_RS07095) | 2.176243074 | amino acid AbC transporter                       |
| gene2310 (KP1_RS11505) | 2.177878606 | DedA family                                      |
| gene846 (KP1_RS04220)  | 2.180626625 | Catalyzes the conversion of L-arabinose to L-    |
| gene3197 (KP1_RS15950) | 2.181279813 | Pfam:DUF407                                      |
| gene3432 (KP1_RS17040) | 2.181289613 | Transcriptional regulator                        |
| gene3368 (KP1_RS16795) | 2.184415791 | Thioesterase                                     |
| gene5027 (KP1_RS25055) | 2.184535101 | the transfer of alpha-xylosyl residue from       |
| gene2906 (KP1_RS14480) | 2.18517314  | chloramphenicol                                  |
| gene503 (KP1_RS02530)  | 2.186418458 | membrane                                         |
| gene1362 (KP1_RS06845) | 2.187913486 | Transcriptional regulator                        |
| gene2647 (KP1_RS13185) | 2.188135884 | Protein of unknown function, DUF606              |
| gene338 (KP1_RS01650)  | 2.188779309 | LrgA family                                      |
| gene2005 (KP1_RS10000) | 2.188890491 | transketolase (EC 2.2.1.1)                       |
| gene3956 (KP1_RS19685) | 2.188948429 | Major Facilitator                                |
| gene1878 (KP1_RS09375) | 2.190155267 | pyruvate formate lyase II activase               |
| gene365 (KP1_RS01800)  | 2.191947831 | Phosphonate metabolism                           |
| gene555 (KP1_RS02795)  | 2.194470205 | binding-protein-dependent transport systems      |
| gene2326 (KP1_RS11575) | 2.194953334 | Phenylacetate-CoA oxygenase reductase, PaaK      |
| gene2694 (KP1_RS13420) | 2.197218842 | transporter                                      |
| gene3042 (KP1_RS15170) | 2.197570025 | transport system permease protein                |
| gene2278 (KP1_RS11360) | 2.199313844 | NmrA-like family                                 |
| gene4279 (KP1_RS21330) | 2.199409156 | Fimbrial protein                                 |
| gene4447 (KP1_RS22185) | 2.200154442 | Urea amidohydrolase subunit alpha                |
| gene5061 (KP1_RS25235) | 2.201285978 | Dehydrogenase                                    |
| gene1408 (KP1_RS07065) | 2.202367252 | allantoate amidohydrolase                        |
| gene1898 (KP1_RS09470) | 2.204186359 | Short-chain dehydrogenase reductase sdr          |
| gene3966 (KP1_RS19735) | 2.205791283 | Catalyzes the formation of putrescine from       |
| gene3943 (KP1_RS19620) | 2.206754279 | Resistance protein                               |
| gene3523 (KP1_RS17505) | 2.210504389 | Mannitol dehydrogenase                           |
| gene1496 (KP1_RS07485) | 2.210586202 | Domain of unknown function (DUF3440)             |
| gene5337 (KP1_RS26595) | 2.211794264 | oxidoreductase                                   |
| gene4194 (pduD)        | 2.212941625 | dehydratase, medium subunit                      |
| gene4079 (KP1_RS20305) | 2.214082818 | abc transporter atp-binding protein              |
| gene5043 (KP1_RS25140) | 2.215620237 | Transcriptional regulator                        |
| gene613 (KP1_RS03075)  | 2.216344953 | Protein of unknown function (DUF3158)            |
| gene726 (KP1_RS03635)  | 2.218834217 | 2-oxo-3-deoxygalactonate kinase                  |
| gene243 (KP1_RS01180)  | 2.221756729 | Molybdopterin biosynthesis protein (MoeB)        |
| gene4325 (KP1_RS21560) | 2.221903761 | biogenesis protein                               |
| gene2775 (KP1_RS13825) | 2.226595409 | extracellular solute-binding protein             |

|                        |             |                                                  |
|------------------------|-------------|--------------------------------------------------|
| gene1068 (KP1_RS05335) | 2.230250885 | Dihydrolipoamide acetyltransferase               |
| gene68 (KP1_RS00325)   | 2.233439088 | (ABC) transporter                                |
| gene2348 (KP1_RS11690) | 2.236718752 | Catalyzes the NAD-dependent reduction of         |
| gene1469 (KP1_RS07350) | 2.239078166 | Iron-containing alcohol dehydrogenase            |
| gene713 (KP1_RS03575)  | 2.239968738 | 4-hydroxyphenylacetate degradation bifunctional  |
| gene2771 (KP1_RS13805) | 2.240810934 | extracellular solute-binding protein, family 3   |
| gene4076 (KP1_RS20290) | 2.241717989 | (ROK) family                                     |
| gene4474 (KP1_RS22315) | 2.242139643 | ATP cob(I)alamin adenosyltransferase             |
| gene1451 (KP1_RS07260) | 2.245651737 | esterase                                         |
| gene1098 (KP1_RS05485) | 2.247750297 | ABC transporter, (ATP-binding protein)           |
| gene2942 (KP1_RS14670) | 2.250675204 | reductase                                        |
| gene5406 (KP1_RS26895) | 2.250986814 | Siderophore biosynthesis protein                 |
| gene5335 (KP1_RS26585) | 2.252264986 | AIR synthase related protein                     |
| gene1528 (KP1_RS07640) | 2.252437838 | Hemolysin activator protein                      |
| gene4155 (KP1_RS20695) | 2.252553603 | Converts the aldose L-fucose into the            |
| gene2160 (KP1_RS10775) | 2.255122498 | anthranilate synthase component I                |
| gene4537 (KP1_RS22640) | 2.256663517 | Galactitol-1-phosphate dehydrogenase             |
| gene2394 (KP1_RS11930) | 2.258200281 | CoA-transferase subunit A                        |
| gene2148 (KP1_RS10715) | 2.258492528 | Short-chain dehydrogenase reductase sdr          |
| gene649 (KP1_RS03260)  | 2.261125451 | amine oxidase                                    |
| gene1344 (KP1_RS06745) | 2.2626762   | Aminoimidazole riboside kinase                   |
| gene2658 (KP1_RS13245) | 2.267219691 | GntR Family Transcriptional Regulator            |
| gene2773 (KP1_RS13815) | 2.270745128 | ABC transporter (permease)                       |
| gene1909 (KP1_RS09530) | 2.276465309 | May reduce aminoacrylate peracid to              |
| gene3507 (KP1_RS17425) | 2.277559416 | Resistance protein                               |
| gene1438 (KP1_RS07205) | 2.279965719 | reductase                                        |
| gene3043 (KP1_RS15175) | 2.283244635 | (ABC) transporter                                |
| gene655 (KP1_RS03290)  | 2.284075342 | Heavy metal efflux pump, CzcA                    |
| gene3954 (KP1_RS19675) | 2.28424019  | Glycoside hydrolase family 3 domain protein      |
| gene1456 (KP1_RS07285) | 2.284904684 | transport system permease protein                |
| gene1907 (KP1_RS09520) | 2.285032896 | May reduce toxic product malonic semialdehyde to |
| gene5187 (KP1_RS28365) | 2.28541424  | Anti-FecI sigma factor, FecR                     |
| gene3950 (KP1_RS19655) | 2.285620461 | Major Facilitator                                |
| gene1908 (KP1_RS09525) | 2.286232883 | May increase the rate of spontaneous hydrolysis  |
| gene4533 (KP1_RS22620) | 2.286860091 | of aminoacrylate to malonic semialdehyde.        |
| gene1371 (KP1_RS06885) | 2.287750256 | that is required for full activity and stability |
| gene2956 (KP1_RS14735) | 2.288026084 | 40-residue yvtn family beta-propeller repeat     |
| gene4149 (KP1_RS20655) | 2.289919168 | Required for the export of heme to the periplasm |
| gene4146 (KP1_RS20640) | 2.2965097   | Catalyzes the desulfonation of aliphatic         |
| gene1183 (KP1_RS05935) | 2.297409263 | ABC transporter                                  |
| gene2328 (KP1_RS11585) | 2.298885883 | Fumarate reductase succinate dehydrogenase       |
| gene3982 (KP1_RS19815) | 2.300272661 | Enoyl-CoA hydratase                              |
| gene681 (KP1_RS03420)  | 2.300595849 | Outer membrane usher protein                     |
| gene712 (KP1_RS03570)  | 2.302947817 | Glutathione transferase                          |
| gene4451 (KP1_RS22205) | 2.303121932 | dehydrogenase                                    |
| gene1834 (KP1_RS09160) | 2.310507698 | Inherit from proNOG: Histidine kinase            |
| gene1713 (KP1_RS08560) | 2.310711436 | (ABC) transporter                                |
| gene898 (KP1_RS04485)  | 2.310767747 | hexuronate transporter                           |
| gene2687 (KP1_RS13390) | 2.311836193 | Major pilin subunit                              |
| gene3367 (KP1_RS16790) | 2.314714897 | Protein of unknown function, DUF606              |
| gene4358 (KP1_RS21725) | 2.314994849 | Yersiniabactin biosynthetic protein YbtU         |
| gene1470 (KP1_RS07355) | 2.316411508 | endonuclease I                                   |
| gene4063 (KP1_RS20230) | 2.317338489 | (ABC) transporter                                |
|                        |             | hydrogenase nickel incorporation protein HypB    |

|                        |             |                                                  |
|------------------------|-------------|--------------------------------------------------|
| gene2643 (KP1_RS13165) | 2.31735391  | transcriptional regulator                        |
| gene4304 (KP1_RS21455) | 2.318569302 | carboxymuconolactone decarboxylase               |
| gene4811 (KP1_RS23975) | 2.318646707 | transporter permease                             |
| gene2783 (KP1_RS13865) | 2.320234239 | receptor                                         |
| gene4058 (KP1_RS20210) | 2.321067561 | formate hydrogenlyase subunit 3                  |
| gene2752 (KP1_RS13710) | 2.324638393 | alpha subunit                                    |
| gene356 (KP1_RS01755)  | 2.325021746 | transport system, permease                       |
| gene1491 (KP1_RS07460) | 2.327435393 | reductase                                        |
| gene643 (KP1_RS03230)  | 2.327585616 | Conserved protein                                |
| gene3018 (KP1_RS15040) | 2.327676805 | Major Facilitator                                |
| gene2733 (KP1_RS13620) | 2.332196013 | Extracellular solute-binding protein, family 5   |
| gene5087 (KP1_RS25360) | 2.332624791 | sensory histidine kinase UhpB                    |
| gene1926 (KP1_RS09610) | 2.333251715 | pirin domain protein                             |
| gene847 (KP1_RS04225)  | 2.333806603 | ribulokinase                                     |
| gene5079 (KP1_RS25320) | 2.336147289 | Involved in phosphonate degradation (By          |
| gene4446 (KP1_RS22180) | 2.344699089 | Urea amidohydrolase subunit beta                 |
| gene4156 (KP1_RS20700) | 2.345168546 | L-fuculokinase                                   |
| gene4206 (KP1_RS20950) | 2.345533713 | respiratory-chain NADH dehydrogenase domain, 51  |
| gene4046 (KP1_RS20145) | 2.346300244 | hydrogenase maturation protein HypF              |
| gene3196 (KP1_RS15945) | 2.347766141 | Pfam:DUF403                                      |
| gene4060 (KP1_RS28115) | 2.349399862 | small subunit of hydrogenase-3, iron-sulfur      |
| gene950 (KP1_RS04755)  | 2.349976994 | General secretion pathway protein C              |
| gene3120 (KP1_RS15555) | 2.350268476 | Nitrite reductase (NAD(P)H) large subunit        |
| gene2898 (KP1_RS14430) | 2.353463665 | beta-lactamase domain protein                    |
| gene2911 (KP1_RS14505) | 2.353971747 | (ABC) transporter                                |
| gene5080 (KP1_RS25325) | 2.355998524 | Involved in phosphonate degradation (By          |
| gene72 (KP1_RS00345)   | 2.356642703 | Rhamnulose kinase                                |
| gene2645 (KP1_RS13175) | 2.35700382  | drug resistance transporter, EmrB QacA subfamily |
| gene2815 (KP1_RS14030) | 2.357190568 | benzoate                                         |
| gene1489 (KP1_RS07450) | 2.360974047 | (ABC) transporter                                |
| gene4780 (KP1_RS23830) | 2.364215979 | Competence protein                               |
| gene1411 (KP1_RS07080) | 2.364803458 | GntR family transcriptional regulator            |
| gene2729 (KP1_RS13595) | 2.36517612  | (ABC) transporter                                |
| gene960 (KP1_RS04815)  | 2.368922668 | periplasmic                                      |
| gene939 (KP1_RS04700)  | 2.369065581 | general secretion pathway protein N              |
| gene3015 (KP1_RS15025) | 2.370200138 | ABC transporter                                  |
| gene647 (KP1_RS03250)  | 2.370811296 | cyclopropane-fatty-acyl-phospholipid synthase    |
| gene897 (KP1_RS04480)  | 2.372800508 | pathway protein e                                |
| gene2917 (KP1_RS14535) | 2.376528532 | 2OG-Fe(II) oxygenase                             |
| gene1457 (KP1_RS07290) | 2.377077166 | Enterobactin exporter entS                       |
| gene804 (KP1_RS04015)  | 2.378128636 | UPF0412 protein YaaI                             |
| gene3502 (KP1_RS17395) | 2.378416443 | signal transduction histidine kinase             |
| gene3522 (KP1_RS17500) | 2.380333413 | xylulokinase (EC 2.7.1.17)                       |
| gene3971 (KP1_RS19760) | 2.380430866 | Class II aldolase                                |
| gene4142 (KP1_RS20625) | 2.382345204 | Major Facilitator Superfamily                    |
| gene1086 (KP1_RS05425) | 2.383806738 | transporter                                      |
| gene2350 (KP1_RS11700) | 2.38488615  | Transforms N(2)-succinylglutamate into succinate |
| gene4624 (KP1_RS23080) | 2.38860142  | decarboxylase, beta                              |
| gene2669 (KP1_RS13300) | 2.390486886 | ABC transporter (Permease)                       |
| gene3121 (KP1_RS15560) | 2.39084196  | (ABC) transporter                                |
| gene1449 (KP1_RS07255) | 2.392108832 | Outer membrane receptor FepA                     |
| gene1185 (KP1_RS05945) | 2.394190647 | Fumarate reductase succinate dehydrogenase       |
| gene2200 (KP1_RS10980) | 2.399864092 | amidohydrolase                                   |
| gene4203 (KP1_RS20935) | 2.400687368 | ATP cob(I)alamin adenosyltransferase             |

|                        |             |                                                                                                  |
|------------------------|-------------|--------------------------------------------------------------------------------------------------|
| gene2668 (KP1_RS13295) | 2.401001583 | (ABC) transporter                                                                                |
| gene2929 (KP1_RS14595) | 2.402157064 | FAD linked oxidase                                                                               |
| gene1374 (KP1_RS06900) | 2.40319099  | Nucleoside                                                                                       |
| gene4055 (KP1_RS20195) | 2.404732729 | formate hydrogenlyase complex iron-sulfur                                                        |
| gene1208 (KP1_RS06060) | 2.405325214 | Cysteine synthase                                                                                |
| gene3163 (KP1_RS15780) | 2.408139496 | OmpA family                                                                                      |
| gene706 (KP1_RS03540)  | 2.408465987 | 4-hydroxyphenylacetate catabolism regulatory                                                     |
| gene65 (KP1_RS00310)   | 2.409321393 | alcohol dehydrogenase                                                                            |
| gene558 (KP1_RS02810)  | 2.409878854 | carbonic anhydrase                                                                               |
| gene4863 (KP1_RS24245) | 2.40995142  | Phosphoesterase, PA-phosphatase related                                                          |
| gene1454 (KP1_RS07275) | 2.410782445 | Atp-binding protein                                                                              |
| gene4141 (KP1_RS20620) | 2.413724176 | acyl-CoA dehydrogenase                                                                           |
| gene3190 (KP1_RS15915) | 2.414018021 | monooxygenase                                                                                    |
| gene1410 (KP1_RS07075) | 2.416399287 | Transcriptional regulator GntR family                                                            |
| gene4283 (KP1_RS21350) | 2.416997667 | Fimbrial                                                                                         |
| gene1105 (KP1_RS05530) | 2.418582241 | ethanolamine ammonia-lyase small subunit                                                         |
| gene650 (KP1_RS03265)  | 2.418954817 | short-chain dehydrogenase reductase                                                              |
| gene1094 (KP1_RS05465) | 2.420695897 | Receptor                                                                                         |
| gene1881 (KP1_RS09390) | 2.421429756 | pts system                                                                                       |
| gene4191 (KP1_RS20875) | 2.423739289 | Microcompartments protein                                                                        |
| gene1407 (dppD)        | 2.424449072 | (ABC) transporter                                                                                |
| gene2725 (KP1_RS13570) | 2.425494567 | Beta-lactamase domain-containing protein                                                         |
| gene708 (KP1_RS03550)  | 2.425648998 | Catalyzes the reversible retro-aldol cleavage of                                                 |
| gene4468 (KP1_RS22285) | 2.426024178 | Dehydratase small subunit                                                                        |
| gene2778 (KP1_RS13840) | 2.43041159  | Luciferase family                                                                                |
| gene714 (KP1_RS03580)  | 2.431292921 | 4-hydroxyphenylacetate degradation                                                               |
| gene2644 (KP1_RS13170) | 2.433429201 | Multidrug resistance protein                                                                     |
| gene4012 (KP1_RS19975) | 2.435675139 | Catalyzes the condensation of the acetyl group<br>of acetyl-CoA with 3-methyl-2-oxobutanoate (2- |
| gene5405 (KP1_RS26890) | 2.435842977 | Siderophore biosynthesis protein                                                                 |
| gene2924 (KP1_RS14570) | 2.439266878 | endoribonuclease                                                                                 |
| gene2776 (KP1_RS13830) | 2.439803823 | monooxygenase                                                                                    |
| gene3191 (KP1_RS15920) | 2.441843538 | ABC phosphate phosphonate transporter,                                                           |
| gene1409 (KP1_RS07070) | 2.442321285 | EamA-like transporter family                                                                     |
| gene581 (KP1_RS02920)  | 2.443595576 | outer membrane usher protein                                                                     |
| gene657 (KP1_RS03300)  | 2.444231037 | Periplasmic copper-binding protein                                                               |
| gene4195 (pduE)        | 2.444591786 | Dehydratase small subunit                                                                        |
| gene3981 (KP1_RS19810) | 2.447234881 | Fimbrial protein                                                                                 |
| gene2188 (KP1_RS10915) | 2.448108238 | oxidoreductase                                                                                   |
| gene2330 (KP1_RS11595) | 2.449166518 | phenylacetic acid degradation protein                                                            |
| gene1144 (KP1_RS05730) | 2.451292031 | Transcriptional regulator                                                                        |
| gene1406 (KP1_RS07055) | 2.453485974 | oligopeptide dipeptide ABC transporter                                                           |
| gene1093 (KP1_RS05460) | 2.455363635 | putative enzyme                                                                                  |
| gene1462 (KP1_RS07315) | 2.456800937 | 23-dihydro-2,3-dihydroxybenzoate dehydrogenase                                                   |
| gene1186 (KP1_RS05950) | 2.457101469 | shikimate dehydrogenase substrate binding                                                        |
| gene1099 (KP1_RS05490) | 2.458005523 | extracellular solute-binding protein, family 3                                                   |
| gene4088 (KP1_RS20350) | 2.462877417 | transport protein                                                                                |
| gene4056 (hycE)        | 2.463177367 | Hydrogenase 3, large subunit                                                                     |
| gene3968 (KP1_RS19745) | 2.472026601 | 20G-Fe(II) oxygenase                                                                             |
| gene1480 (KP1_RS07405) | 2.473531214 | cytosine deaminase                                                                               |
| gene4449 (KP1_RS22195) | 2.476641685 | Required for maturation of urease via the                                                        |
| gene346 (KP1_RS01695)  | 2.477070193 | Inner membrane protein yjch                                                                      |
| gene705 (KP1_RS03535)  | 2.477728516 | 4-hydroxyphenylacetate 3-monooxygenase oxygenase                                                 |
| gene2767 (KP1_RS13785) | 2.47799698  | (ABC) transporter                                                                                |

|                        |             |                                                  |
|------------------------|-------------|--------------------------------------------------|
| gene557 (KP1_RS02805)  | 2.478653427 | Sulfate transporter                              |
| gene612 (KP1_RS03070)  | 2.480272239 | dNA topoisomerase                                |
| gene2288 (KP1_RS11410) | 2.481538393 | ABC transporter (permease)                       |
| gene3501 (KP1_RS17390) | 2.484168088 | Heat shock protein                               |
| gene3972 (KP1_RS19765) | 2.485330168 | D-isomer specific 2-hydroxyacid dehydrogenase    |
| gene4031 (KP1_RS20070) | 2.486182461 | (ABC) transporter                                |
| gene1114 (KP1_RS05580) | 2.486493508 | Phospholipid Glycerol Acyltransferase            |
| gene3002 (KP1_RS14960) | 2.489221634 | Cysteine dioxygenase type I                      |
| gene3057 (KP1_RS15245) | 2.492652026 | Hemin uptake protein                             |
| gene942 (KP1_RS04715)  | 2.495792004 | type II secretion system protein K               |
| gene4848 (KP1_RS24170) | 2.49960727  | Extracellular solute-binding protein, family 5   |
| gene614 (KP1_RS03080)  | 2.500098105 | Domain of unknown function (DUF1845)             |
| gene2910 (KP1_RS14500) | 2.501432217 | (ABC) transporter                                |
| gene616 (KP1_RS03090)  | 2.502493033 | Protein of unknown function (DUF2857)            |
| gene2250 (KP1_RS11230) | 2.507010699 | type VI secretion protein, VC_A0114 family       |
| gene1054 (KP1_RS05275) | 2.50942735  | May be involved in the control of utilization of |
| gene3033 (KP1_RS15125) | 2.510092855 | DoxX Family                                      |
| gene4202 (KP1_RS20930) | 2.510691249 | utilization protein                              |
| gene1910 (KP1_RS09535) | 2.512525086 | In vivo, quickly hydrolyzes the ureidoacrylate   |
| gene3963 (KP1_RS19720) | 2.512612953 | peracid to avoid toxicity, but can also          |
| gene2987 (KP1_RS14880) | 2.514205812 | monooxygenase                                    |
| gene1453 (entF)        | 2.515205967 | amino acid AbC transporter                       |
| gene2999 (KP1_RS14945) | 2.516021256 | Peptide synthetase                               |
| gene363 (KP1_RS01790)  | 2.518548056 | acyl-Coa dehydrogenase                           |
| gene5046 (KP1_RS25155) | 2.520389826 | phosphonate C-P lyase system protein PhnL        |
| gene3957 (KP1_RS19690) | 2.522005785 | pyridoxamine 5-phosphate                         |
| gene2323 (KP1_RS11560) | 2.522286928 | cyclase family                                   |
| gene3148 (KP1_RS15695) | 2.522635705 | Phenylacetate-CoA oxygenase subunit PaaB         |
| gene5333 (KP1_RS26575) | 2.525867107 | Type VI secretion system                         |
| gene896 (KP1_RS04475)  | 2.526728706 | radical SAM domain protein                       |
| gene2933 (KP1_RS14625) | 2.530781442 | type IV pilin biogenesis protein                 |
| gene2351 (KP1_RS11705) | 2.533181907 | CoA-transferase subunit A                        |
| gene4057 (hycD)        | 2.539510066 | Amino acid permease                              |
| gene1349 (KP1_RS06775) | 2.543395584 | Formate hydrogenlyase subunit 4                  |
| gene2251 (KP1_RS11235) | 2.54522046  | transport system permease protein                |
| gene4284 (KP1_RS21355) | 2.546588173 | Type IV VI secretion system protein, DotU family |
| gene2923 (KP1_RS14565) | 2.546650114 | FIMH SUBUNIT MANNOSE-sensitive type 1 fimbrial   |
| gene2915 (KP1_RS14525) | 2.546839218 | cytosine deaminase                               |
| gene2296 (KP1_RS11450) | 2.550563506 | Major Facilitator                                |
| gene1471 (KP1_RS07360) | 2.554204827 | DeoR family transcriptional regulator            |
| gene368 (KP1_RS01815)  | 2.563529909 | inner-membrane translocator                      |
| gene2252 (KP1_RS11240) | 2.563786923 | Phosphonate C-P lyase system protein PhnG        |
| gene1835 (KP1_RS09165) | 2.564876578 | Ompa motb domain protein                         |
| gene946 (KP1_RS04735)  | 2.565081509 | fmn reductase                                    |
| gene1096 (KP1_RS05475) | 2.567198163 | general secretion pathway protein G              |
| gene1089 (KP1_RS05440) | 2.570420205 | amino acid ABC transporter                       |
| gene2329 (KP1_RS11590) | 2.5714947   | Phosphonate ABC transporter                      |
| gene2115 (KP1_RS10540) | 2.573045751 | 3-hydroxyacyl-coa dehydrogenase                  |
| gene576 (KP1_RS02895)  | 2.580342629 | SNARE associated Golgi protein                   |
| gene3952 (KP1_RS19665) | 2.581419466 | exported protein                                 |
| gene3200 (KP1_RS15960) | 2.582494434 | monooxygenase                                    |
| gene2083 (KP1_RS10375) | 2.582498795 | receptor                                         |
| gene2925 (KP1_RS14575) | 2.585045618 | Major facilitator transporter                    |
|                        |             | K01470 creatinine amidohydrolase EC 3.5.2.10     |



|                        |             |                                                                                                 |
|------------------------|-------------|-------------------------------------------------------------------------------------------------|
| gene1363 (KP1_RS06850) | 2.585439265 | Major Facilitator                                                                               |
| gene3826 (KP1_RS19025) | 2.585562605 | Major Facilitator Superfamily                                                                   |
| gene5054 (KP1_RS25200) | 2.58930002  | Resistance protein                                                                              |
| gene4147 (KP1_RS20645) | 2.592547944 | monooxygenase                                                                                   |
| gene3005 (KP1_RS14975) | 2.594369702 | transporter                                                                                     |
| gene2347 (KP1_RS11685) | 2.59466716  | Arginine                                                                                        |
| gene4094 (KP1_RS20380) | 2.595003265 | Inherit from bactNOG: cytoplasmic protein                                                       |
| gene940 (KP1_RS04705)  | 2.595606592 | General secretion pathway                                                                       |
| gene1905 (KP1_RS09510) | 2.600575585 | permease                                                                                        |
| gene1570 (KP1_RS07850) | 2.600982258 | One of the components of the high-affinity ATP-driven potassium transport (or KDP) system,      |
| gene387 (pgaB)         | 2.609607158 | Biofilm PGA synthesis lipoprotein PgaB                                                          |
| gene1097 (KP1_RS05480) | 2.616119429 | amino acid abc transporter                                                                      |
| gene4205 (KP1_RS20945) | 2.616638011 | alcohol dehydrogenase                                                                           |
| gene1110 (KP1_RS05560) | 2.617051411 | taurine ABC transporter, periplasmic binding                                                    |
| gene3009 (KP1_RS14995) | 2.618164629 | Alpha beta hydrolase                                                                            |
| gene938 (KP1_RS04695)  | 2.620812783 | Cleaves type-4 fimbrial leader sequence and                                                     |
| gene2740 (KP1_RS13655) | 2.620912344 | glyoxalase bleomycin resistance protein                                                         |
| gene67 (KP1_RS00320)   | 2.626128789 | (ABC) transporter                                                                               |
| gene4148 (KP1_RS20650) | 2.626796683 | Pyridine nucleotide-disulphide oxidoreductase                                                   |
| gene5062 (KP1_RS25240) | 2.637325197 | AcnD-accessory protein PrpF                                                                     |
| gene605 (KP1_RS03040)  | 2.640981272 | Lytic transglycosylase catalytic                                                                |
| gene3044 (KP1_RS15180) | 2.643787368 | Major Facilitator Superfamily protein                                                           |
| gene1361 (KP1_RS06840) | 2.64523281  | Involved in 'Ser-type' sulfatase maturation                                                     |
| gene3969 (KP1_RS19750) | 2.646960667 | under anaerobic conditions. Catalyzes the post-ABC transporter substrate-binding protein        |
| gene3006 (KP1_RS14980) | 2.648864618 | Catalyzes the retro-aldol cleavage of 4-hydroxy-2-oxopentanoate to pyruvate and acetaldehyde.   |
| gene658 (KP1_RS03305)  | 2.64903439  | RND efflux system, outer membrane lipoprotein                                                   |
| gene3007 (KP1_RS14985) | 2.650830563 | Catalyzes the conversion of acetaldehyde to acetyl-CoA, using NAD( ) and coenzyme A. Is the     |
| gene507 (KP1_RS02550)  | 2.653235731 | 4-hydroxy-2-oxoglutarate aldolase                                                               |
| gene2254 (KP1_RS11250) | 2.653625648 | Type VI secretion ATPase, ClpVI family                                                          |
| gene1358 (KP1_RS06825) | 2.65428911  | Molybdenum cofactor biosynthesis protein F                                                      |
| gene3959 (KP1_RS19700) | 2.654656865 | Rieske [2Fe-2S] domain                                                                          |
| gene1569 (KP1_RS07845) | 2.659276414 | One of the components of the high-affinity ATP-driven potassium transport (or KDP) system,      |
| gene945 (KP1_RS04730)  | 2.659894528 | General secretion pathway protein H                                                             |
| gene4849 (KP1_RS24175) | 2.660267025 | Nickel transporter permease NikB                                                                |
| gene2765 (KP1_RS13775) | 2.666264393 | binding-protein-dependent transport systems                                                     |
| gene1460 (entE)        | 2.667042169 | 2,3-dihydroxybenzoate-AMP ligase                                                                |
| gene4089 (KP1_RS20355) | 2.669389191 | periplasmic                                                                                     |
| gene2979 (KP1_RS14840) | 2.669703775 | Catalytic subunit of the periplasmic nitrate reductase (NAP). Only expressed at high levels     |
| gene1871 (KP1_RS09340) | 2.670918471 | abc transporter permease protein                                                                |
| gene2114 (KP1_RS10535) | 2.673233489 | Antioxidant protein with alkyl hydroperoxidase activity. Required for the reduction of the AhpC |
| gene2928 (KP1_RS14590) | 2.67355205  | binding-protein-dependent transport systems                                                     |
| gene5056 (KP1_RS25210) | 2.673739635 | drug resistance transporter, Bcr CflA                                                           |
| gene2750 (KP1_RS13700) | 2.673887683 | Benzoate 12-dioxygenase                                                                         |
| gene1435 (KP1_RS07190) | 2.674902064 | Transcriptional regulator                                                                       |
| gene648 (KP1_RS03255)  | 2.676482606 | plasmid partition ParA protein                                                                  |
| gene362 (KP1_RS01785)  | 2.679819759 | phosphonate metabolism protein PhnM                                                             |
| gene2992 (KP1_RS14910) | 2.687263549 | transport system permease protein                                                               |

|                        |             |                                                                                                    |
|------------------------|-------------|----------------------------------------------------------------------------------------------------|
| gene2663 (KP1_RS13270) | 2.69461979  | Catalyzes the dehydration of inosose (2-keto-<br>myo- inositol, 2KMI or 2,4,6 3,5-                 |
| gene5073 (KP1_RS25295) | 2.7020521   | #NAME?                                                                                             |
| gene604 (KP1_RS03035)  | 2.704452912 | Inherit from proNOG: TRANSFER protein                                                              |
| gene1334 (KP1_RS06690) | 2.704482767 | 2-dehydrogenase                                                                                    |
| gene364 (KP1_RS01795)  | 2.704759647 | phosphonate C-P lyase system protein PhnK                                                          |
| gene553 (KP1_RS02785)  | 2.705626545 | Hydrolyzes cAMP to 5'-AMP. Plays an important                                                      |
| gene322 (KP1_RS01580)  | 2.707370523 | Transcriptional regulator                                                                          |
| gene3516 (KP1_RS17470) | 2.711286389 | binding-protein-dependent transport systems                                                        |
| gene3725 (KP1_RS18505) | 2.712560518 | transporter                                                                                        |
| gene2270 (KP1_RS11320) | 2.712689877 | type VI secretion protein, VC_A0111 family                                                         |
| gene2628 (KP1_RS13090) | 2.714999141 | 2-nitropropane dioxygenase                                                                         |
| gene4444 (KP1_RS22170) | 2.717840295 | Required for maturation of urease via the                                                          |
| gene2918 (KP1_RS14540) | 2.718703895 | K03382 hydroxyatrazine ethylaminohydrolase EC                                                      |
| gene1911 (KP1_RS09540) | 2.720628206 | Catalyzes the pyrimidine ring opening between N-<br>3 and C- 4 by an unusual flavin hydroperoxide- |
| gene71 (KP1_RS00340)   | 2.724458674 | L-rhamnose isomerase                                                                               |
| gene2922 (KP1_RS14560) | 2.727039671 | vanillate o-demethylase oxidoreductase                                                             |
| gene2684 (KP1_RS13375) | 2.729724109 | coenzyme PQQ biosynthesis protein PqqF                                                             |
| gene1405 (KP1_RS07050) | 2.733307267 | inner membrane component                                                                           |
| gene2660 (KP1_RS13255) | 2.734516952 | Guanine deaminase                                                                                  |
| gene2995 (KP1_RS14925) | 2.736239007 | (ABC) transporter                                                                                  |
| gene594 (KP1_RS02985)  | 2.740866056 | exported protein                                                                                   |
| gene2937 (KP1_RS14645) | 2.742723974 | Citrate transporter                                                                                |
| gene3003 (KP1_RS14965) | 2.745272142 | Rhodanese domain protein                                                                           |
| gene718 (KP1_RS27305)  | 2.747886095 | Oxidoreductase                                                                                     |
| gene4001 (nrdI)        | 2.749631413 | Probably involved in ribonucleotide reductase                                                      |
| gene2327 (KP1_RS11580) | 2.752091165 | Enoyl-CoA hydratase                                                                                |
| gene2682 (KP1_RS13365) | 2.755621743 | Pyrroloquinoline quinone biosynthesis protein D                                                    |
| gene366 (KP1_RS01805)  | 2.757893584 | Phosphonate metabolism                                                                             |
| gene2934 (KP1_RS14630) | 2.759093564 | transferase, beta subunit                                                                          |
| gene2755 (KP1_RS13725) | 2.760890757 | Muconate                                                                                           |
| gene3948 (KP1_RS19645) | 2.763301223 | major facilitator superfamily protein                                                              |
| gene2989 (KP1_RS14895) | 2.767292611 | Transcriptional regulator                                                                          |
| gene2994 (KP1_RS14920) | 2.769419345 | receptor                                                                                           |
| gene606 (KP1_RS03045)  | 2.771426076 | exported protein                                                                                   |
| gene4047 (KP1_RS20150) | 2.771879294 | electron transport protein hydN                                                                    |
| gene1416 (KP1_RS07105) | 2.773370127 | Dehydrogenase                                                                                      |
| gene242 (KP1_RS01175)  | 2.77422419  | thiamine biosynthesis protein ThiS                                                                 |
| gene2289 (KP1_RS11415) | 2.775689251 | Aromatic amino acid aminotransferase                                                               |
| gene2325 (KP1_RS11570) | 2.78066097  | Phenylacetate-CoA oxygenase PaaJ subunit                                                           |
| gene1425 (KP1_RS07145) | 2.789267234 | binding-protein-dependent transport systems                                                        |
| gene3165 (KP1_RS15790) | 2.790737277 | type VI secretion protein, VC_A0114 family                                                         |
| gene3953 (KP1_RS19670) | 2.794436236 | NAD(P)H-dependent FMN reductase                                                                    |
| gene2991 (KP1_RS14905) | 2.801850634 | ABC transporter (Permease)                                                                         |
| gene3458 (KP1_RS17175) | 2.804768169 | imidazole acetol-phosphate transaminase                                                            |
| gene1181 (KP1_RS05925) | 2.80623712  | transporter                                                                                        |
| gene4282 (KP1_RS21345) | 2.80634091  | Fimbrial                                                                                           |
| gene1833 (KP1_RS09155) | 2.806495211 | Catalyzes the desulfonation of aliphatic                                                           |
| gene2909 (KP1_RS14495) | 2.813292317 | Permease protein                                                                                   |
| gene1404 (KP1_RS07045) | 2.813692752 | binding-protein-dependent transport systems                                                        |
| gene4466 (KP1_RS22275) | 2.814452422 | glycerol uptake facilitator protein                                                                |
| gene1488 (KP1_RS07445) | 2.817616415 | Permease protein                                                                                   |
| gene2073 (KP1_RS10325) | 2.829734007 | transporter                                                                                        |

|                        |             |                                                                                                 |
|------------------------|-------------|-------------------------------------------------------------------------------------------------|
| gene4281 (KP1_RS21340) | 2.829767212 | outer membrane usher protein                                                                    |
| gene552 (KP1_RS02780)  | 2.834179145 | (ABC) transporter                                                                               |
| gene2777 (KP1_RS13835) | 2.842572142 | amidohydrolase                                                                                  |
| gene2324 (KP1_RS11565) | 2.844713438 | Phenylacetate-CoA oxygenase, PaaI subunit                                                       |
| gene1482 (KP1_RS07415) | 2.845650183 | Cytosine permease                                                                               |
| gene3967 (KP1_RS19740) | 2.84724616  | Xylose Isomerase Domain-Containing protein                                                      |
| gene2766 (KP1_RS13780) | 2.85007567  | extracellular solute-binding protein, family 1                                                  |
| gene2749 (benD)        | 2.85053     | 1,6-dihydroxycyclohexa-2,4-diene-1-carboxylate                                                  |
| gene4150 (KP1_RS20665) | 2.858309434 | transcriptional regulator                                                                       |
| gene1417 (KP1_RS07110) | 2.862653665 | Aminotransferase                                                                                |
| gene1439 (KP1_RS07210) | 2.869142216 | ABC transporter (Permease)                                                                      |
| gene2990 (KP1_RS14900) | 2.871232712 | iron compound-binding protein of ABC transporter                                                |
| gene947 (KP1_RS04740)  | 2.875735644 | General secretion pathway protein F                                                             |
| gene1481 (KP1_RS07410) | 2.876630251 | PucR family transcriptional regulator                                                           |
| gene3123 (KP1_RS15570) | 2.887829608 | ABC-type nitrate sulfonate bicarbonate transport                                                |
| gene2738 (KP1_RS13645) | 2.890793838 | Antioxidant protein with alkyl hydroperoxidase activity. Required for the reduction of the AhpC |
| gene1359 (KP1_RS06830) | 2.898474134 | short-chain dehydrogenase reductase                                                             |
| gene3147 (KP1_RS15690) | 2.903844784 | type VI secretion-associated protein                                                            |
| gene944 (KP1_RS04725)  | 2.906390909 | General secretion pathway protein I                                                             |
| gene3008 (KP1_RS14990) | 2.915815636 | hydratase                                                                                       |
| gene3149 (KP1_RS15700) | 2.918785697 | Inherit from COG: Type VI secretion                                                             |
| gene2639 (KP1_RS13145) | 2.930665472 | Protein of unknown function (DUF3225)                                                           |
| gene3150 (KP1_RS15705) | 2.934585693 | type VI secretion protein, VC_A0111 family                                                      |
| gene2998 (KP1_RS14940) | 2.936750537 | (ABC) transporter                                                                               |
| gene388 (KP1_RS01920)  | 2.937660711 | outer membrane protein PgaA                                                                     |
| gene1455 (KP1_RS07280) | 2.938837739 | transporter, permease                                                                           |
| gene2736 (KP1_RS13635) | 2.949696531 | (ABC) transporter                                                                               |
| gene2936 (KP1_RS14640) | 2.958389762 | 3-hydroxyacyl-coa dehydrogenase                                                                 |
| gene2737 (KP1_RS13640) | 2.964502515 | monooxygenase                                                                                   |
| gene1459 (KP1_RS07300) | 2.970008087 | Isochorismate synthase                                                                          |
| gene1486 (KP1_RS07435) | 2.971914657 | pfkB family carbohydrate kinase                                                                 |
| gene709 (KP1_RS03555)  | 2.975177409 | hydratase                                                                                       |
| gene572 (KP1_RS02875)  | 2.980616951 | DNA primase                                                                                     |
| gene4625 (KP1_RS23085) | 2.981484307 | Oxaloacetate decarboxylase                                                                      |
| gene2941 (KP1_RS14665) | 2.98675059  | acetolactate synthase                                                                           |
| gene593 (KP1_RS02980)  | 3.023394053 | (Lipo)protein                                                                                   |
| gene4062 (KP1_RS20225) | 3.027123291 | Probably plays a role in a hydrogenase nickel                                                   |
| gene2735 (KP1_RS13630) | 3.044922266 | binding-protein-dependent transport systems                                                     |
| gene323 (KP1_RS01585)  | 3.050320892 | Metallo-beta-lactamase superfamily                                                              |
| gene1380 (KP1_RS06930) | 3.050862957 | Major Facilitator Superfamily                                                                   |
| gene2395 (KP1_RS11935) | 3.059109832 | CoA-transferase subunit B                                                                       |
| gene585 (KP1_RS02940)  | 3.060116162 | Pts system, glucitol sorbitol-specific                                                          |
| gene2997 (KP1_RS14935) | 3.06448922  | Substrate-binding protein                                                                       |
| gene3011 (mhpA)        | 3.07275453  | Catalyzes the insertion of one atom of molecular                                                |
| gene1891 (KP1_RS09435) | 3.085061942 | dehydrogenase                                                                                   |
| gene2670 (KP1_RS13305) | 3.087518085 | ABC transporter substrate-binding protein                                                       |
| gene595 (KP1_RS02990)  | 3.088474027 | exported protein                                                                                |
| gene2638 (KP1_RS13140) | 3.090266009 | Allows the formation of correctly charged Gln-tRNA(Gln) through the transamidation of           |
| gene948 (KP1_RS04745)  | 3.094409358 | pathway protein e                                                                               |
| gene2583 (KP1_RS12865) | 3.098849103 | Aldo/keto reductase family                                                                      |
| gene2926 (KP1_RS14580) | 3.106654927 | (ABC) transporter                                                                               |
| gene609 (KP1_RS03060)  | 3.139644493 | Protein of unknown function (DUF3577)                                                           |

|                        |             |                                                                         |
|------------------------|-------------|-------------------------------------------------------------------------|
| gene3122 (KP1_RS15565) | 3.141950995 | nitrate ABC transporter                                                 |
| gene2996 (KP1_RS14930) | 3.144932134 | Binding-protein-dependent transport systems,                            |
| gene4201 (KP1_RS20925) | 3.147887854 | Propanediol utilization                                                 |
| gene1087 (KP1_RS05430) | 3.155096191 | Phosphonate ABC transporter                                             |
| gene943 (KP1_RS04720)  | 3.181197046 | General secretion pathway protein J                                     |
| gene941 (KP1_RS04710)  | 3.182744938 | Involved in a type II secretion system (T2SS,                           |
| gene2935 (KP1_RS14635) | 3.194353564 | Catalyzes the final step of fatty acid oxidation                        |
| gene4038 (KP1_RS20105) | 3.213916971 | DNA-binding transcriptional activator GutM                              |
| gene3958 (KP1_RS19695) | 3.223586005 | fumarylacetoacetate (FAA) hydrolase                                     |
| gene693 (KP1_RS03480)  | 3.224154864 | lysine exporter protein LysE YggA                                       |
| gene1182 (KP1_RS05930) | 3.235771863 | Xylose Isomerase Domain-Containing protein                              |
| gene2636 (KP1_RS13130) | 3.240693405 | gamma-glutamyltranspeptidase EC 2.3.2.2                                 |
| gene1487 (KP1_RS07440) | 3.27684689  | ABC transporter (Permease)                                              |
| gene1184 (KP1_RS05940) | 3.285970325 | NIPSNAP family containing protein                                       |
| gene2927 (KP1_RS14585) | 3.317322977 | (ABC) transporter                                                       |
| gene5053 (KP1_RS25195) | 3.356610409 | RND Family Efflux Transporter MFP Subunit                               |
| gene1102 (KP1_RS05510) | 3.382701554 | leucine isoleucine valine transporter permease                          |
| gene1906 (KP1_RS09515) | 3.440439334 | Catalyzes the reduction of FMN to FMNH <sub>2</sub> which is            |
| gene282 (KP1_RS01370)  | 3.457999519 | Branched-chain amino acid transport protein                             |
| gene3010 (mhpB)        | 3.47806858  | Catalyzes the non-heme iron(II)-dependent<br>oxidative cleavage of 2,3- |
| gene1458 (KP1_RS07295) | 3.520423205 | Iron-enterobactin transporter periplasmic                               |
| gene4000 (KP1_RS19905) | 3.537082659 | Glutaredoxin-like protein                                               |
| gene2734 (KP1_RS13625) | 3.537798247 | binding-protein-dependent transport systems                             |
| gene369 (KP1_RS01820)  | 3.609180416 | Transcriptional regulator                                               |
| gene367 (KP1_RS01810)  | 3.869971054 | Carbon-phosphorus lyase complex subunit                                 |
| gene4064 (KP1_RS20235) | 4.052735038 | hydrogenase assembly chaperone                                          |
| gene4059 (KP1_RS20215) | 4.085266839 | small subunit of hydrogenase-3, iron-sulfur                             |
